# Supplementary material for: Variations of main quality components of matcha from different regions in the Chinese market
Source: Front Nutr. 2023 Mar 9;10:1153983. doi: 10.3389/fnut.2023.1153983 (PMC10034323; doi:10.3389/fnut.2023.1153983)
Supplement: Supplementary file 2 [file Table_2.XLSX]

## Sheet: HS-SPME
135 high-concentration substances in different regions of matcha detected by HS-SPME (mg/L)
Compounds	CAS	Class	MT	MY	ML	MR	MJ	GM1	GM2	ZM1	ZM2	JM	M-GS	VIP	p_value	Type
2-Octenoic Acid	1470-50-4	Acid	12.8624	27.0047	14.4828	14.4738	12.9577	12.9554	13.8977	15.6978	15.5183	17.3836	14.411	0.915099	2.22459e-06	insig
Homovanillic Acid	306-08-1	Acid	9.02164	15.021	9.12036	9.08658	6.77181	6.94655	8.06545	9.94753	7.90265	8.78883	6.75681	1.2521	2.80559e-07	sig
Benzenepropanoic Acid, 4-hydroxy-	501-97-3	Acid	8.82183	14.6488	8.45939	9.07772	6.78118	7.03325	7.85597	9.59429	7.61487	8.65619	6.178	1.21545	1.15983e-06	sig
Undecanoic Acid	112-37-8	Acid	6.82036	11.3771	6.84436	7.34543	6.46969	6.95679	8.26985	9.44625	8.88801	9.21333	8.47236	0.789691	0.00935128	insig
Hippuric Acid	495-69-2	Acid	3.17703	5.40303	3.56312	3.85807	3.35285	3.38151	3.8924	5.0571	4.8437	4.9381	3.4224	1.07635	0.00942183	sig
Lavandulyl caproate	59550-36-6	Acid	1.84755	2.82066	1.72436	1.67926	1.18625	1.11198	1.44694	1.9186	1.55668	1.85196	1.89332	1.118	1.53696e-05	sig
Benzeneacetic Acid, 4-hydroxy-	156-38-7	Acid	1.64983	1.67534	4.17488	4.86382	4.59906	2.05218	4.2982	4.7426	5.73317	4.59351	3.20011	0.543875	1.50177e-12	insig
1-Hexadecanol	36653-82-4	Alcohol	224.924	327.921	125.145	127.612	114.753	148.449	126.642	178.617	121.829	128.033	124.652	1.08711	4.84374e-10	sig
3-Cyclohexen-1-ol, 1-(1,5-dimethyl-4-hexenyl)-4-methyl-	15352-77-9	Alcohol	20.259	33.8379	20.1432	20.6851	15.5308	16.0873	18.0975	22.3566	17.7601	20.3791	14.7479	1.22288	3.61158e-07	sig
Benzenepropanol, 4-hydroxy-3-methoxy-	2305-13-7	Alcohol	8.95305	14.9746	8.55644	9.15433	6.79527	6.88357	7.97069	9.87621	7.84783	8.69347	6.45802	1.27409	9.16368e-07	sig
cis-9-Tetradecen-1-ol	35153-15-2	Alcohol	7.54076	12.881	7.71889	8.15635	6.39001	7.66267	8.5379	10.3888	8.37416	11.478	6.54194	0.771659	1.72431e-06	insig
3,5-Dihydroxy-4'-methoxydiphenyl	54960-96-2	Alcohol	5.53186	8.20339	5.04361	5.41246	4.66538	5.35454	5.57509	6.51352	5.85486	6.20892	5.45354	0.807388	0.0722961	insig
(E)-2,6-Dimethylocta-5,7-dien-2-ol	7643-60-9	Alcohol	4.17792	8.449	4.5759	4.48899	4.83315	4.39692	4.90689	4.82195	4.85981	4.53364	4.18471	0.900598	3.99619e-08	insig
3,4-Dimethylcyclohexanol	5715-23-1	Alcohol	2.48029	3.62806	9.1767	11.0454	12.1948	6.74189	11.5641	15.069	15.7198	15.017	10.9358	0.130228	2.38924e-07	insig
Patulin	149-29-1	Alcohol	1.56093	1.6321	3.90228	4.58767	4.26737	1.90405	4.07754	4.53124	5.51672	4.46969	2.92158	0.58875	3.44842e-12	insig
3-Phenylpropanol	122-97-4	Alcohol	1.39835	3.11748	3.22443	3.1682	3.00474	2.74855	2.76481	3.18078	3.12172	4.45519	4.12592	0.557574	8.91722e-06	insig
Benzenemethanol, 3-hydroxy-	620-24-6	Alcohol	1.34327	2.16706	1.42535	1.42934	1.35038	1.27391	1.49293	1.4867	1.74911	1.55829	1.60198	1.1567	6.58747e-07	sig
2-Decen-1-ol, (E)-	18409-18-2	Alcohol	1.13918	2.08921	1.07003	1.11492	1.11473	1.13422	1.19611	1.19794	1.18194	1.15879	1.19667	0.846648	2.79373e-12	insig
Cyclohexanol, 2,6-dimethyl-	5337-72-4	Alcohol	1.02769	3.76597	1.67011	1.22936	1.61305	1.59884	1.80121	1.4908	1.52964	1.49934	1.88002	0.356893	4.47947e-08	insig
3-(4-Hydroxyphenyl)propanal	20238-83-9	Aldehyde	26.384	41.894	25.8012	27.0903	23.5237	20.9585	27.5135	30.1028	28.0888	28.3786	28.9441	1.19541	4.11205e-06	sig
1-Cyclohexene-1-carboxAldehyde, 4-(1-methylethenyl)-, (S)-	18031-40-8	Aldehyde	6.9744	12.9333	6.84431	6.67485	6.73532	6.91045	7.14874	6.88485	6.72793	5.91832	7.07566	0.810668	1.36011e-12	insig
(E)-2-Decenal	3913-81-3	Aldehyde	6.41236	10.7993	5.62182	5.74951	5.75779	5.61552	5.93283	5.85808	5.81697	5.84203	5.99442	0.880597	4.30589e-12	insig
Tetradecanal	124-25-4	Aldehyde	2.24027	4.47217	1.25858	1.05835	1.41995	1.34556	1.3628	2.22478	1.67839	1.52584	2.45628	1.02905	5.32119e-10	sig
BenzenAmine, 2-methyl-3,5-dinitro-	35572-78-2	Amine	29.0588	43.1523	26.681	29.3162	24.8986	28.5617	30.3574	35.1636	32.1182	32.6521	28.9299	0.849722	0.0849005	insig
N,N'-Methylenebismethacrylamide	2359-15-1	Amine	9.25808	15.7556	9.569	9.92562	7.45557	7.64947	8.77518	10.7798	8.70132	9.67792	7.10135	1.2575	1.6367e-06	sig
N,N-Dimethyl-1,2,3-trithian-5-Amine	31895-21-3	Amine	1.78491	2.74382	1.71354	1.76042	1.74034	1.41681	1.89265	2.31414	2.08641	1.90655	2.29979	1.26208	4.68442e-06	sig
Hordenine	539-15-1	Amine	1.31484	2.11233	1.25434	1.2882	1.10732	1.06834	1.28961	1.51703	1.43735	1.44946	1.39311	1.27671	5.35614e-06	sig
1,3-Benzodioxole, 4-methoxy-6-(2-propenyl)-	607-91-0	Aromatics	6.1511	11.9122	6.28084	5.50364	5.52302	5.5254	6.47275	8.55354	6.53298	8.78314	7.15207	0.642396	0.0136156	insig
Dehydromevalonic lactone	2381-87-5	Aromatics	3.71804	7.71497	3.99312	3.9628	4.38538	4.2591	4.36085	4.26328	4.37965	4.06884	4.00774	0.788932	1.84653e-13	insig
Benzene, 1,2,3-trimethoxy-5-(1-propenyl)-, (E)-	5273-85-8	Aromatics	2.95022	4.71666	2.68672	2.96178	2.24132	2.25216	2.6542	3.34654	2.59516	2.94749	2.33083	1.25914	8.75244e-07	sig
Benzene, 1-methyl-2-(1-ethylpropyl)-	54410-74-1	Aromatics	1.62422	3.64013	1.65524	1.71022	1.9695	1.64298	1.97027	2.56196	2.46369	1.73669	2.45445	1.27937	1.40981e-10	sig
Naphthalene, 1,2-dihydro-4,5,7-trimethyl-	53156-11-9	Aromatics	1.56098	2.52754	1.45049	1.69774	1.46447	1.54669	1.92017	2.13979	2.06518	2.1856	1.88233	0.75539	0.00430599	insig
(Z)-Cinnamyl benzoate	117204-78-1	Ester	202.049	302.035	184.858	204.53	171.528	199.495	213.419	248.045	222.948	228.629	201.921	0.84016	0.0649334	insig
Cyclopentaneacetic acid, 3-oxo-2-pentyl-, methyl ester	24851-98-7	Ester	46.9407	77.1181	48.5172	46.6418	36.0956	37.8156	41.5018	50.4943	39.95	47.387	33.7238	1.12952	3.30499e-07	sig
Benzyl tiglate	37526-88-8	Ester	36.189	57.6774	35.1204	36.7015	31.709	29.3555	36.2796	43.6161	41.7113	41.3278	40.2845	1.35123	1.90846e-06	sig
2,6,10-Dodecatrien-1-ol, 3,7,11-trimethyl-, acetate, (E,E)-	4128-17-0	Ester	15.8506	20.9488	9.91167	15.9636	5.63796	43.3139	23.628	13.0446	6.8777	6.8629	9.36546	1.15891	3.18457e-13	sig
2,4-Decadienoic acid, ethyl ester, (E,Z)-	3025-30-7	Ester	13.3866	22.626	13.4662	14.4778	12.6802	13.5481	16.1013	18.4755	17.6649	18.4837	16.601	0.782678	0.0143926	insig
Dibutyl phthalate	84-74-2	Ester	12.0216	16.1625	41.4666	33.6805	20.4702	32.2598	84.032	14.3218	15.535	40.0766	86.9289	1.82854	2.48879e-10	sig
Pentanoic acid, 3,7-dimethyl-2,6-octadienyl ester, (E)-	10402-47-8	Ester	9.25127	15.6784	9.67353	9.8506	7.44928	7.63681	8.74897	10.6374	8.66571	9.53964	7.1389	1.24302	2.88531e-06	sig
ethyl safranate	35044-59-8	Ester	8.78909	13.3933	16.127	15.764	22.8001	14.3704	25.6742	28.6211	35.1044	22.2917	20.7035	0.589933	1.03806e-06	insig
Butanoic acid, 5-hexenyl ester	108058-75-9	Ester	8.56585	17.9382	9.471	9.43557	8.51593	8.59145	9.15703	10.3651	10.0185	11.3393	9.60127	0.891874	2.01395e-06	insig
9-Hexadecenoic acid, methyl ester, (Z)-	1120-25-8	Ester	8.3593	11.8138	3.06436	5.69483	1.99961	13.4797	7.76297	4.30218	2.24253	2.18033	3.84951	0.579608	2.1223e-12	insig
2-Phenoxyethyl isobutyrate	103-60-6	Ester	8.14121	13.1888	8.60563	8.55724	7.91475	7.09175	8.35526	10.084	10.2916	9.78045	9.82928	1.33418	5.61236e-06	sig
2-Butenoic acid, 3-hexenyl ester, (E,Z)-	65405-80-3	Ester	8.13817	15.2633	7.90769	7.74286	7.884	8.10011	8.17722	8.04609	8.10749	7.83142	8.12825	0.816545	2.68071e-14	insig
Hexadecanoic acid, methyl ester	112-39-0	Ester	7.14631	10.5803	3.59937	3.79019	4.93548	10.6916	7.42	7.47684	7.31174	9.41577	3.80618	0.218779	7.34761e-06	insig
2-Butenoic acid, hexyl ester	19089-92-0	Ester	5.90962	12.5939	6.73323	6.68398	5.9957	6.08763	6.45234	7.35892	7.19183	7.99779	6.75702	0.901202	3.83754e-06	insig
Linalyl acetate	115-95-7	Ester	4.19529	7.80258	3.90243	3.88754	3.89372	3.9159	3.84566	3.90802	3.90471	3.8693	4.16764	0.843271	5.51516e-14	insig
Methyl jasmonate	1211-29-6	Ester	4.08928	6.70929	3.65706	3.95129	2.92697	2.68973	3.4661	4.50333	3.60241	4.2351	2.80407	1.3184	5.45877e-06	sig
Butanoic acid, 3-methyl-, 2-phenylethyl ester	140-26-1	Ester	2.50827	3.98228	2.37182	2.45722	2.08162	1.96858	2.41942	2.91978	2.75061	2.7594	2.67719	1.32713	4.61385e-06	sig
Butanoic acid, 2-methyl-, 2-phenylethyl ester	24817-51-4	Ester	2.5076	3.98178	2.3713	2.45807	2.08334	1.94549	2.42012	2.92224	2.72593	2.75942	2.6821	1.31671	5.36088e-06	sig
N-Benzyloxy-2-carbomethoxyaziridine	53084-33-6	Ester	2.36943	2.38962	5.65222	6.62886	6.28581	2.68375	5.89499	6.54318	8.03582	6.32184	4.36481	0.630276	3.56846e-12	insig
Diisopropyl adipate	6938-94-9	Ester	2.18872	3.56252	2.08665	2.29208	1.95021	2.00507	2.46348	2.83713	2.74031	3.00632	2.5831	0.83959	0.0045547	insig
2-Furancarboxylic acid, octyl ester	39251-88-2	Ester	2.16757	3.27788	1.76667	1.96544	1.36812	1.30941	1.74889	2.32296	1.81629	2.25362	1.46898	1.34087	8.9142e-08	sig
Benzeneacetic acid, 4-(1,1-dimethylethyl)-, methyl ester	3549-23-3	Ester	1.95252	2.59899	2.10912	2.28854	2.18126	1.62583	2.31657	2.801	2.75871	2.5999	2.92244	0.974554	3.41679e-05	sig
Bicyclo[3.1.1]hept-2-en-6-ol, 2,7,7-trimethyl-, acetate, [1S-(1α,5α,6β)]-	50764-55-1	Ester	1.56607	2.92564	3.15405	3.08306	2.69246	2.56446	2.55979	2.97688	3.26762	4.42276	4.13573	0.440574	2.84164e-06	insig
Hexadecanoic acid, ethyl ester	628-97-7	Ester	1.22038	1.83372	1.12185	1.2338	1.04538	1.20861	1.2657	1.47577	1.34209	1.35316	1.18151	0.878083	0.0744923	insig
(3-Bromo-1-methylpropoxymethyl)benzene	51666-29-6	Halogenated hydrocarbons	36.3963	58.3329	35.3479	36.9307	31.9771	29.8581	36.9044	43.9234	41.856	41.5402	41.0719	1.315	1.90786e-06	sig
3-Butylisobenzofuran-1(3H)-one	6066-49-5	Heterocyclic compound	15.9508	25.708	15.7613	15.651	11.9387	12.282	13.7849	17.0203	13.2717	15.4966	11.719	1.18192	2.32665e-07	sig
2-((3,3-Dimethyloxiran-2-yl)methyl)-3-methylfuran	92356-06-4	Heterocyclic compound	15.4623	32.4416	15.5185	15.1297	16.5175	16.8945	16.5385	16.1023	16.2627	15.5755	15.7083	0.748496	5.59169e-15	insig
Thiophene, 2-dodecyl-	4861-61-4	Heterocyclic compound	8.93983	11.3804	5.28684	9.02914	3.07429	24.8295	13.1778	6.92174	3.72136	3.66531	5.49547	1.20636	9.85364e-14	sig
Carbamic acid, (1-methylethyl)-, 2-[[(aminocarbonyl)oxy]methyl]-2-methylpentyl ester	78-44-4	Heterocyclic compound	8.88428	12.5207	4.36701	6.33632	2.99369	14.424	8.69171	5.92239	3.44804	3.36836	4.37446	0.548699	2.52741e-12	insig
Methoxsalen	298-81-7	Heterocyclic compound	5.5266	8.19016	5.04211	5.41777	4.6515	5.35948	5.5789	6.51655	5.86982	6.21526	5.43915	0.808439	0.0729233	insig
2-Amino-6-t-butyl-3-cyano-4,5,6,7-tetrahydrothianaphthene	42159-76-2	Heterocyclic compound	2.84127	4.29407	2.74106	3.04822	2.47895	2.93332	3.26595	3.52486	3.19988	3.31019	3.06652	0.604272	0.19777	insig
Thiophene, 2-pentyl-	4861-58-9	Heterocyclic compound	1.89419	3.91172	1.96239	1.94019	2.13897	2.11174	2.13785	2.10749	2.18394	2.03495	2.00932	0.81038	8.86119e-14	insig
(3R,6R)-2,2,6-Trimethyl-6-vinyltetrahydro-2H-pyran-3-ol	14009-71-3	Heterocyclic compound	1.87803	3.87843	1.90645	1.87996	2.07274	2.05381	2.0464	1.99312	2.00306	1.86372	1.9234	0.770944	3.54209e-14	insig
1-Pentanone, 1-(2-furanyl)-	3194-17-0	Heterocyclic compound	1.68659	3.5004	1.73896	1.71703	1.91277	1.92681	1.91279	1.74181	1.69895	1.70022	1.73581	0.556396	8.12294e-14	insig
1,8,11,14-Heptadecatetraene, (Z,Z,Z)-	10482-53-8	Hydrocarbons	11.9144	19.7036	11.1819	11.9712	9.07173	9.36926	10.3491	12.6865	10.1581	11.4924	8.3829	1.23012	5.60057e-07	sig
Nonadecane	629-92-5	Hydrocarbons	11.8337	16.3106	7.85561	11.5391	5.09493	26.1404	15.9484	10.0673	6.44355	6.15452	8.46653	1.03502	3.24032e-12	sig
Undecane, 3,8-dimethyl-	17301-30-3	Hydrocarbons	11.6379	24.6166	13.1442	13.1667	11.812	11.9588	12.7921	14.425	13.7552	15.4304	13.4738	0.875907	1.433e-06	insig
1-Nonadecene	18435-45-5	Hydrocarbons	11.3823	15.2084	6.9997	10.4662	4.57938	24.579	14.9937	8.95697	5.22803	5.03178	7.36503	1.02678	1.03655e-12	sig
Undecane, 5,7-dimethyl-	17312-83-3	Hydrocarbons	8.56915	17.9383	9.471	9.43572	8.51594	8.59163	9.15703	10.3651	10.0185	11.3389	9.60144	0.892147	2.01714e-06	insig
Undecane, 4,7-dimethyl-	17301-32-5	Hydrocarbons	6.67729	14.2778	7.55817	7.51684	6.753	6.80613	7.25222	8.27755	8.03543	9.10325	7.63199	0.888476	2.44821e-06	insig
1-Pentadecene	13360-61-7	Hydrocarbons	6.39223	10.3276	6.02061	6.22202	5.38773	5.15156	6.2355	7.16629	6.67248	6.80827	6.77173	1.21981	8.22191e-07	sig
Eicosane	112-95-8	Hydrocarbons	2.8677	5.86831	2.10389	2.28116	2.33607	4.49876	2.99423	3.47307	3.08543	3.04311	2.67992	0.213824	2.85825e-07	insig
1-Dodecene	112-41-4	Hydrocarbons	2.56511	5.36017	2.92446	2.92503	2.61013	2.65642	2.82374	3.16941	3.11915	3.43183	2.87784	0.90823	4.24379e-06	insig
Cyclobuta[1,2:3,4]dicyclooctene, 1,2,5,6,6a,6b,7,8,11,12,12a,12b-dodecahydro-, (6aα,6bβ,12aα,12bβ)-	61277-44-9	Hydrocarbons	1.41909	2.28077	1.39191	1.52235	1.09322	1.05163	1.30758	1.566	1.39571	1.71288	1.10818	1.16692	8.70642e-06	sig
8-Hexadecyne	19781-86-3	Hydrocarbons	1.31976	2.17579	1.35548	1.53076	1.16564	1.19468	1.50015	1.8977	2.54052	2.21736	1.43249	1.33678	1.3083e-06	sig
Dodecane, 5-methyl-	17453-93-9	Hydrocarbons	1.1162	2.26869	1.14121	1.10626	1.12771	1.17933	1.15806	1.17862	1.11872	1.12277	1.14712	0.786494	2.58107e-12	insig
2-Cyclohexen-1-one, 3-methyl-	1193-18-6	Ketone	32.1051	62.4217	34.8403	34.2327	36.3904	36.1479	38.5995	35.9767	39.5524	34.3006	35.4221	0.820137	3.78998e-12	insig
2(5H)-Furanone, 5-ethyl-3-hydroxy-4-methyl-	698-10-2	Ketone	9.1406	16.9377	8.61814	8.39566	8.57912	8.79641	8.85331	8.83245	8.74569	8.57036	8.89817	0.834593	1.66254e-14	insig
Ethanone, 1-(3-hydroxyphenyl)-	121-71-1	Ketone	8.78222	13.3912	16.136	15.7225	22.7747	14.3904	25.6732	28.6506	35.1147	22.3615	20.726	0.58708	1.05696e-06	insig
2-Butanone, 4-(2,6,6-trimethyl-1-cyclohexen-1-yl)-	17283-81-7	Ketone	8.73241	13.4239	16.0814	15.6802	22.7318	14.4368	25.6067	28.5755	35.0273	22.253	20.6633	0.58564	1.1269e-06	insig
2,5-Pyrrolidinedione, 1-ethyl-	2314-78-5	Ketone	6.74601	14.0955	7.59965	7.5617	6.78708	6.77152	7.2787	8.22421	8.04766	9.01683	7.7105	0.904439	1.29229e-06	insig
2H-Furo[2,3-h]-1-benzopyran-2-one, 5-methoxy-	482-48-4	Ketone	5.52297	8.20573	5.04362	5.41966	4.65239	5.35838	5.58151	6.51706	5.87016	6.21642	5.45679	0.806258	0.0716575	insig
4-Hexen-3-one, 5-methyl-	13905-10-7	Ketone	2.80419	5.16162	3.08036	2.99381	3.14291	3.10422	3.38256	3.21388	3.65345	3.38815	3.00821	0.861842	5.60275e-12	insig
4-Isopropyl-1,3-cyclohexanedione	62831-62-3	Ketone	2.67871	5.01262	2.57977	2.55028	2.56104	2.60079	2.60873	2.64501	2.61318	2.56642	2.64042	0.86673	2.51235e-13	insig
7-Oxabicyclo[4.1.0]heptan-2-one, 6-methyl-3-(1-methylethyl)-	5286-38-4	Ketone	2.65281	4.98406	2.55461	2.5324	2.56009	2.57406	2.59583	2.62756	2.60406	2.55261	2.60094	0.881156	2.83776e-13	insig
2H-Indol-2-one, 1,3-dihydro-	59-48-3	Ketone	2.53795	3.99365	2.3741	2.45706	2.08074	1.92359	2.41844	2.92203	2.74902	2.75706	2.71659	1.3436	2.07157e-06	sig
2-Cyclopenten-1-one, 2-hydroxy-3,4-dimethyl-	21835-00-7	Ketone	2.23436	3.46455	1.82087	1.85326	2.05254	2.06258	2.12642	1.98171	2.22926	2.05622	2.57062	0.510306	8.27629e-06	insig
3-[4-Hydroxyisopent-2(Z)-enyl]-4-hydroxyacetophenone	24672-83-1	Ketone	1.52192	2.2288	1.3693	1.52153	1.2724	1.43673	1.61129	1.84242	1.66014	1.75183	1.56549	0.786328	0.101563	insig
1-Butanone, 2-hydroxy-1-phenyl-	16183-46-3	Ketone	1.1967	1.5645	3.51146	4.2483	3.71433	1.84294	4.12932	5.42991	6.9002	4.77316	3.67567	0.791895	1.09646e-11	insig
Dodecanenitrile	2437-25-4	Nitrogen compounds	4.52115	7.00089	3.82061	3.92707	3.25574	3.22697	3.85475	4.50828	4.46569	4.54692	3.6438	1.3866	3.68921e-07	sig
Butanoic acid, anhydride	106-31-0	Others	2.45031	3.53066	9.1767	10.9233	12.1948	6.69642	11.7109	14.9801	15.7198	15.006	10.8373	0.114529	1.57295e-07	insig
Phenol, 4-propyl-	645-56-7	Phenol	12.9302	24.5298	12.4856	12.434	12.4628	12.6125	12.5015	12.6259	12.5529	12.5031	12.5184	0.856104	4.20845e-13	insig
Ethanethioic acid, S-(2-furanylmethyl) ester	13678-68-7	Sulfur compounds	1.81873	3.74857	1.87656	1.86423	2.04438	2.01425	2.04307	1.97963	2.07224	1.93841	1.88824	0.799962	1.00727e-13	insig
Chalcone	94-41-7	Terpenoids	40.4341	59.6995	36.6596	39.9057	34.3088	39.1594	41.3905	48.0343	43.6987	44.7183	40.0382	0.861999	0.0613281	insig
Carvenone	499-74-1	Terpenoids	29.7343	56.207	29.0949	28.9475	29.0597	29.1794	29.0501	29.2379	29.1492	29.1122	29.495	0.840533	2.97984e-13	insig
[1α,4aα,8aα]-1,2,4a,5,6,8a-hexahydro-4-7-dimethyl-1-[1-methylethyl]naphthalene	31983-22-9	Terpenoids	26.7236	43.0283	26.243	27.3609	23.8151	21.9229	27.3244	32.5925	30.6083	30.5471	30.3667	1.31955	1.09223e-06	sig
α-Muurolene	10208-80-7	Terpenoids	26.6766	42.8942	26.1829	27.3225	23.8037	21.8948	27.2842	32.5555	30.8745	30.499	30.2609	1.33638	1.19203e-06	sig
Eremophilene	10219-75-7	Terpenoids	26.4821	42.0613	25.8831	27.1639	23.6749	21.9999	27.575	32.7519	31.2203	30.7665	30.3373	1.32552	2.08566e-06	sig
1,3-Cyclohexadiene, 5-(1,5-dimethyl-4-hexenyl)-2-methyl-, [S-(R*,S*)]-	495-60-3	Terpenoids	25.8805	41.9816	24.8584	25.9334	22.4993	21.5896	25.8862	30.7643	29.2756	29.3404	28.9259	1.26533	2.77949e-06	sig
(1S,2E,6E,10R)-3,7,11,11-Tetramethylbicyclo[8.1.0]undeca-2,6-diene	24703-35-3	Terpenoids	23.1243	37.6502	22.4936	23.5681	20.864	19.7019	24.1099	28.3944	25.9079	26.4994	26.807	1.19494	1.68122e-06	sig
(3S,3aR,6R,8aS)-3,7,7-Trimethyl-8-methylenehexahydro-1H-3a,6-methanoazulen-2(3H)-one	28624-27-3	Terpenoids	16.4038	26.1077	15.903	16.3135	11.9464	12.2729	14.1663	17.7266	14.2607	15.5259	11.4398	1.33038	1.26673e-06	sig
Noruron	18530-56-8	Terpenoids	16.2794	24.0174	14.6749	15.8741	13.6553	15.463	16.3855	19.137	17.3656	17.8377	16.1593	0.895756	0.039236	insig
Acetic acid, (4,6,8,9-tetramethyl-3-oxabicyclo[3.3.1]non-6-en-1-yl)methyl ester	309722-81-4	Terpenoids	16.0681	26.0201	15.7525	15.9357	12.081	12.3928	13.8861	17.0977	13.4757	15.5318	11.7595	1.19837	2.65081e-07	sig
Bicyclo[2.2.1]heptan-2-ol, 1,7,7-trimethyl-, (1S-endo)-	464-45-9	Terpenoids	15.9973	32.7513	15.4196	15.1167	16.6078	17.2324	16.745	16.2367	16.5747	15.7625	15.8655	0.745493	9.81752e-15	insig
Citronellyl tiglate	24717-85-9	Terpenoids	15.7379	25.9008	15.852	15.9413	12.0349	12.2526	14.0299	16.9986	13.5952	15.2736	10.6848	1.23613	3.66197e-07	sig
(1aR,1bS,2aS,5S,5aS,7aS)-2,2,5,7a-Tetramethyldecahydrocyclopenta[2',3']cyclobuta[1',2':3,4]benzo[1,2-b]oxirene	104188-24-1	Terpenoids	11.4302	11.7626	28.0794	33.083	31.369	13.5178	29.2504	32.3886	39.6536	31.4092	21.1302	0.608151	3.57562e-12	insig
β-Guaiene	88-84-6	Terpenoids	10.789	16.9312	9.74624	10.0791	8.53025	8.26153	9.86509	11.5531	10.7391	11.1797	10.8653	1.21452	1.29924e-05	sig
Bicyclosesquiphellandrene	54324-03-7	Terpenoids	10.7852	16.9312	9.74214	10.0763	8.52267	8.25141	9.86179	11.5075	10.7069	11.127	10.8609	1.21234	1.18176e-05	sig
(5R,10R)-10-Methyl-6-methylene-2-(propan-2-ylidene)spiro[4.5]dec-7-ene	28908-27-2	Terpenoids	9.56349	16.1985	9.51257	9.97958	8.29956	8.15837	9.91618	11.71	11.1288	11.1906	10.65	1.23214	3.38403e-05	sig
(2R,3R,6S)-6-Isopropyl-3-methyl-2-(prop-1-en-2-yl)-3-vinylcyclohexanone	39020-72-9	Terpenoids	9.30152	14.6904	8.63719	8.96207	7.39512	7.1315	8.7518	10.6142	9.82416	10.0476	9.69841	1.29545	1.81161e-05	sig
2,6,10-Dodecatrienal, 3,7,11-trimethyl-	19317-11-4	Terpenoids	9.27631	15.7639	9.4725	9.92057	7.45048	7.65979	8.75507	10.6192	8.70516	9.59591	6.69251	1.25683	1.65617e-06	sig
3-Cyclohexene-1-methanol, α,α,4-trimethyl-, propanoate	80-27-3	Terpenoids	8.6227	13.1258	16.0135	15.6144	22.6634	14.2313	25.5168	28.4964	34.9906	22.1953	20.5232	0.585932	1.04911e-06	insig
(1S,5S,6R)-6-Methyl-2-methylene-6-(4-methylpent-3-en-1-yl)bicyclo[3.1.1]heptane	15438-94-5	Terpenoids	7.4244	11.9748	6.80592	7.07524	6.10298	5.88388	7.12805	8.22337	7.67843	7.90486	7.56717	1.23178	7.71811e-07	sig
8-(2,6-Dimethyl-hepta-1,5-dienyl)-3,7,7-trimethyl-bicyclo[4.2.0]oct-2-ene	113725-56-7	Terpenoids	7.14243	8.05756	4.71447	8.58858	2.89711	24.9807	13.3522	6.94811	3.49808	3.7135	5.10717	1.39182	1.8365e-13	sig
Carvone oxide, trans-	39903-97-4	Terpenoids	6.43041	12.0971	6.11496	6.17447	6.20089	6.13555	6.05025	6.26245	6.0535	6.16666	6.46715	0.84212	1.92989e-13	insig
1,3,6,10-Dodecatetraene, 3,7,11-trimethyl-, (Z,E)-	26560-14-5	Terpenoids	6.39237	10.3276	6.02055	6.22287	5.38757	5.15156	6.23986	7.16628	6.67095	6.8115	6.77053	1.21825	7.93834e-07	sig
(-)-Carvone	6485-40-1	Terpenoids	6.22665	11.4795	5.96915	5.91362	5.92934	5.95698	5.97306	6.04725	6.02873	5.9846	6.13977	0.865222	4.69032e-13	insig
Bicyclo[3.1.1]hept-2-ene, 2,6-dimethyl-6-(4-methyl-3-pentenyl)-	17699-05-7	Terpenoids	5.64309	8.795	10.3077	10.0618	14.2919	9.16004	16.1704	17.8849	21.7737	14.0352	13.7881	0.556254	1.75858e-06	insig
Cyclobutaneethanol, 1-methyl-2-(1-methylethenyl)-, cis-	30820-22-5	Terpenoids	5.6191	12.2278	6.45931	6.43044	5.59626	6.44549	6.2651	6.93831	6.90868	7.84219	6.15674	0.746437	8.628e-06	insig
β-Acorenol	28400-11-5	Terpenoids	5.06418	7.91398	4.43519	5.10875	3.64974	3.90046	4.48136	5.45931	4.39013	4.79418	3.24726	1.29888	9.62073e-06	sig
Azulene, 1,2,3,3a,4,5,6,7-octahydro-1,4-dimethyl-7-(1-methylethenyl)-, [1R-(1α,3aβ,4α,7β)]-	22567-17-5	Terpenoids	4.81545	7.94787	4.79964	5.17753	4.46735	4.8534	5.74523	6.82019	6.39607	6.82557	5.99422	0.766694	0.0177	insig
4-(1-methylethyl)-Benzaldehyde	122-03-2	Terpenoids	3.27569	7.44462	2.75804	2.95391	3.48526	2.96907	3.59237	5.01647	4.80921	2.99707	4.63722	1.37682	9.13394e-12	sig
d-Nerolidol	142-50-7	Terpenoids	3.15259	3.39452	7.41995	8.64771	8.24757	3.8768	8.3791	9.24634	11.3522	9.10996	6.02499	0.588023	7.86705e-13	insig
Daucol	887-08-1	Terpenoids	2.90817	4.82073	2.80534	3.0197	2.18808	2.00149	2.56837	3.23391	2.6137	2.9875	2.40165	1.29543	2.25911e-05	sig
Geraniol	106-24-1	Terpenoids	2.63582	4.97579	2.54483	2.52833	2.56009	2.56147	2.59019	2.62198	2.60176	2.54535	2.59918	0.883852	3.78586e-13	insig
Isopinocarveol	6712-79-4	Terpenoids	2.56511	5.36017	2.92446	2.92503	2.61013	2.65642	2.82374	3.16661	3.1195	3.43155	2.92272	0.903607	2.84337e-06	insig
Levomenol	23089-26-1	Terpenoids	2.34333	3.62705	2.0418	2.35773	1.60517	1.7822	2.07537	2.56693	2.11039	2.56731	1.60865	1.14053	3.17844e-05	sig
3-Buten-2-one, 4-(2,2,6-trimethyl-7-oxabicyclo[4.1.0]hept-1-yl)-	23267-57-4	Terpenoids	2.23636	3.70459	2.40507	2.67241	2.43547	2.44999	2.99365	3.40532	3.31139	3.25812	3.01851	0.789026	0.026879	insig
(-)-Aristolene	6831-16-9	Terpenoids	2.20023	2.60459	6.24228	7.36149	6.39928	3.2037	6.76518	9.33244	11.5034	8.47867	6.55902	0.750792	8.75062e-12	insig
(1R,3aS,8aS)-7-Isopropyl-1,4-dimethyl-1,2,3,3a,6,8a-hexahydroazulene	36577-33-0	Terpenoids	2.20016	2.61903	6.24228	7.36153	6.39912	3.23028	6.76926	9.33243	11.5028	8.48803	6.56375	0.74846	9.07746e-12	insig
4-Hexen-1-ol, 5-methyl-2-(1-methylethenyl)-, (R)-	498-16-8	Terpenoids	1.90365	3.93165	2.14411	2.11194	2.36365	2.23339	2.35836	2.31178	2.41187	2.20098	2.14152	0.818735	2.2024e-12	insig
Santalol, E-cis,epi-β-	14490-17-6	Terpenoids	1.70911	2.76969	1.51556	1.69442	1.21765	1.22946	1.45807	1.94471	1.69862	1.76887	1.05738	1.47673	5.42096e-06	sig
(1S,4R,7S,8R,11R,13R)-4,7,11-Trimethyl-5-oxatetracyclo[5.4.2.01,8.04,13]tridecane	18319-31-8	Terpenoids	1.59648	1.69298	4.16983	4.67669	4.30283	2.03994	4.31318	4.62959	5.76167	4.52275	3.04937	0.552978	1.95534e-11	insig

## Sheet: SAFE
120 high-concentration substances in different regions of matcha detected by SAFE (mg/L)
Compounds	CAS	Class	MT	MY	ML	MR	MJ	GM1	GM2	ZM1	ZM2	JM	M-GS	VIP	p_value	Type
Benzoic Acid, 2,4-dihydroxy-6-methyl-	480-64-8	Acid	30.8592	29.0091	26.6613	27.6277	31.9785	28.7047	30.1586	38.1842	26.1444	31.2792	30.0463	0.117913	0.323784	insig
Erucic Acid	112-86-7	Acid	2.61296	2.28723	2.54151	2.29847	2.18529	1.64734	1.85365	2.17777	1.2495	3.03666	1.9706	0.197068	0.00487817	insig
3,4-Dimethylcyclohexanol	5715-23-1	Alcohol	24.3674	17.9678	9.24977	10.4206	20.6019	17.1458	20.8287	23.5562	26.8787	26.2368	12.7669	0.725146	4.92891e-19	insig
2-Cyclohexen-1-ol, 1-methyl-4-(1-methylethenyl)-, trans-	7212-40-0	Alcohol	13.5712	13.538	20.6424	21.0448	13.0851	11.8932	4.82719	11.9895	15.4752	13.3644	15.3241	1.08776	4.30278e-07	sig
Benzyl Alcohol	100-51-6	Alcohol	6.7833	5.58977	2.57822	3.18407	3.03377	6.16715	4.20972	5.17128	6.28235	17.5725	3.96873	0.613433	3.38397e-15	insig
3-Hexen-1-ol, (Z)-	928-96-1	Alcohol	4.7435	4.92014	1.06676	1.20872	1.09517	3.89811	1.93193	2.69699	2.09795	4.92064	1.25646	0.0293528	2.63166e-14	insig
trans-2-Undecen-1-ol	75039-84-8	Alcohol	3.19644	3.11169	1.36749	3.10159	2.78299	3.09811	2.56476	1.1432	1.13596	3.00032	2.35805	1.51474	3.12868e-12	sig
2-Nonen-1-ol	22104-79-6	Alcohol	3.13918	2.83122	1.62179	1.92156	2.01163	2.16844	1.57771	1.60195	2.07952	1.96632	1.73072	0.833083	1.46457e-05	insig
2-Octen-1-ol, (E)-	18409-17-1	Alcohol	2.89003	2.67463	1.81086	2.58094	2.44988	2.90148	2.14142	1.78274	2.60265	2.77355	1.88032	0.229333	0.00104516	insig
2-Penten-1-ol, (Z)-	1576-95-0	Alcohol	2.1233	1.42235	1.31754	1.79966	3.75858	2.20164	3.67472	3.93709	5.55735	4.50437	2.00782	0.457575	3.42019e-14	insig
Batilol	544-62-7	Alcohol	1.36477	1.2797	2.05611	1.65888	1.2673	1.28064	1.167	1.60647	2.58163	1.74908	1.28141	1.18893	0.0383263	sig
AcetAldehyde, (3,3-dimethylcyclohexylidene)-, (Z)-	26532-24-1	Aldehyde	5.36487	4.54514	3.21439	3.32265	6.16227	4.45105	6.39161	8.07244	8.0526	6.63512	3.24119	1.03183	1.26322e-15	sig
BenzAldehyde	100-52-7	Aldehyde	4.31309	3.4224	4.98752	5.58154	5.53333	3.41126	5.87007	5.45663	6.05706	7.0874	2.80609	0.238281	2.9317e-09	insig
Tridecanal	10486-19-8	Aldehyde	2.89135	2.85133	3.02163	3.13775	2.47105	2.81795	3.33006	2.66159	2.89648	3.42613	3.98559	0.871632	0.0704922	insig
BenzeneacetAldehyde	122-78-1	Aldehyde	2.82039	2.19936	5.13137	4.31862	4.79302	3.24563	5.59331	5.58613	3.60778	5.32597	5.37685	0.970445	7.09892e-06	insig
2,5-FurandicarboxAldehyde	823-82-5	Aldehyde	2.27843	1.48457	2.05512	2.57724	8.4331	4.36179	6.61764	5.86455	12.4578	7.58622	2.97355	0.358265	2.40826e-20	insig
(E)-2-Octenal	2548-87-0	Aldehyde	2.19043	1.95254	1.18498	1.96353	1.85193	2.09754	2.02579	1.0804	1.35984	2.14633	1.37249	1.3894	1.43328e-06	sig
Benzene, 1,3-dimethyl-	108-38-3	Aromatics	10.4951	10.1676	11.2167	9.96235	9.19137	9.24423	8.66635	9.06172	8.78977	11.249	11.0425	0.363609	0.0355096	insig
p-Xylene	106-42-3	Aromatics	10.4863	10.1635	11.2001	9.95783	9.18854	9.22528	8.66232	9.04893	8.78159	11.2268	11.0249	0.358783	0.0373233	insig
(3-Bromo-1-methylpropoxymethyl)benzene	51666-29-6	Aromatics	7.70364	6.27751	3.49832	4.15496	6.79702	5.25171	7.22051	9.03386	9.22722	8.02917	5.93041	1.15174	1.56175e-11	sig
(5-bromopentyl)-Benzene,	14469-83-1	Aromatics	7.70259	6.27672	3.49754	4.15496	6.79212	5.08816	7.2203	8.79837	9.18028	7.2027	5.75791	1.32384	1.52418e-11	sig
Benzene, 1,2,4-trimethyl-	95-63-6	Aromatics	6.89733	6.82264	2.60951	6.17641	6.18388	6.89238	5.32526	1.77186	1.72043	6.38005	3.84246	1.46305	7.91295e-09	sig
3,4-Dimethoxytoluene	494-99-5	Aromatics	5.40339	4.58201	3.26693	3.39112	6.24501	4.44238	6.47475	8.20805	8.19541	6.73221	3.30991	1.05117	2.54281e-15	sig
Benzene, (1-methyl-1-propylpentyl)-	54932-91-1	Aromatics	5.02474	4.21036	2.36737	2.76407	4.55314	3.70117	5.09935	6.3436	6.13189	5.54501	4.24523	0.961377	1.42958e-11	insig
o-Xylene	95-47-6	Aromatics	4.69057	4.60119	4.92261	4.57791	4.15769	4.37026	4.00988	3.90329	3.74149	5.14542	5.08514	0.872192	0.0185213	insig
Ethylbenzene	100-41-4	Aromatics	3.30019	3.17019	3.6999	3.11228	2.89171	2.91182	2.99108	2.79136	2.88504	4.54474	3.43832	0.858435	0.000668845	insig
Toluene	108-88-3	Aromatics	3.1289	2.98197	3.67862	3.04422	2.94919	2.38239	2.50303	2.53152	2.48197	3.25061	2.64399	0.14528	0.00240115	insig
Naphthalene	91-20-3	Aromatics	2.87416	1.56938	2.02639	2.13173	1.54314	2.21882	2.00507	1.80738	1.75472	3.33323	1.79212	0.930087	1.41388e-07	insig
Butanoic Acid, 3-methylbutyl ester	106-27-4	Ester	14.1756	12.7488	6.59033	11.9843	10.5392	13.084	10.9158	6.84554	7.61248	12.3364	8.13709	0.998018	3.73306e-07	insig
Phenyl salicylate	118-55-8	Ester	13.3389	12.8021	11.6316	11.8563	14.0644	12.5538	13.0749	17.0098	11.2275	13.9114	12.7322	0.132743	0.27149	insig
2H-Pyran-2-one, tetrahydro-6-pentyl-	705-86-2	Ester	8.08766	8.26709	5.49161	6.87508	6.48126	8.49176	6.98418	4.80058	4.95268	8.60145	5.56574	1.34717	5.39769e-07	sig
Butanoic acid, 3-methyl-, 3,7-dimethyl-2,6-octadienyl ester, (Z)-	3915-83-1	Ester	7.31227	10.4259	4.79255	4.35249	6.04494	8.05061	3.18246	6.88445	5.75318	8.63234	1.51538	0.699413	5.95578e-09	insig
Butanoic acid, octyl ester	110-39-4	Ester	6.83844	6.65618	6.65966	6.61222	6.56512	6.5322	6.52247	6.40694	6.34587	6.06665	6.187	0.680215	1.2206e-05	insig
Butanoic acid, 1-methylhexyl ester	39026-94-3	Ester	5.98483	5.66227	1.7421	4.77418	4.40461	5.42709	4.29781	1.36937	1.33297	5.01092	3.24604	1.348	1.4529e-11	sig
Octanoic acid-tert butyl ester	5457-66-9	Ester	4.74156	4.53268	3.04403	3.90482	3.69923	4.32753	3.66609	2.83783	3.16682	4.03434	3.10478	0.563024	5.71295e-06	insig
δ-Dodecalactone	713-95-1	Ester	4.12292	3.96391	3.32924	3.97713	3.52395	3.89722	4.95072	3.19406	3.35578	3.89374	3.12535	0.877316	0.0378812	insig
Propanoic acid, 2,2-dimethyl-, pentyl ester	2313-68-0	Ester	3.86479	3.57622	2.19995	3.36547	3.52695	3.79471	2.96276	2.31222	3.1436	3.43462	2.48681	0.404748	0.000243132	insig
(3S,3aR)-3-Butyl-3a,4,5,6-tetrahydroisobenzofuran-1(3H)-one	4567-33-3	Ester	3.85678	3.59867	3.3289	3.45797	3.90218	3.57094	3.59236	4.45313	3.15273	3.56852	3.24613	0.283811	0.430394	insig
3-Methylheptyl acetate	72218-58-7	Ester	3.22475	2.55108	1.20151	1.29404	2.42699	2.10681	2.30518	2.70792	3.13714	3.02267	1.49386	0.9938	4.4484e-14	insig
Butanoic acid, 2-methyl-, 2-methylbutyl ester	2445-78-5	Ester	2.50997	2.3026	1.39977	1.88315	1.62766	1.92712	1.62767	1.65307	1.7744	1.85232	1.46695	0.799577	3.84745e-05	insig
Hexanoic acid, 3-phenyl-2-propenyl ester	6994-20-3	Ester	2.08376	2.02341	2.21281	1.95971	1.65817	1.92852	2.92836	2.05325	2.29909	2.01934	1.55089	0.0191349	0.0553572	insig
Propanoic acid, 2-methyl-, 3-hydroxy-2,2,4-trimethylpentyl ester	77-68-9	Ester	2.05902	1.9543	1.26928	2.32204	2.08216	1.97042	1.75041	1.27103	1.37778	2.38285	1.87448	1.3168	4.91034e-08	sig
Furfuryl pentanoate	36701-01-6	Ester	2.03731	1.71877	1.22038	1.25865	2.27086	1.60972	2.32023	2.94257	2.99291	2.41789	1.20846	1.14883	1.68635e-15	sig
Hexanoic acid, cyclopentyl ester	5413-59-2	Ester	1.83912	1.77012	1.58356	1.52104	1.36508	1.65124	1.61053	1.48513	1.70806	1.4519	1.3485	0.916601	0.0154886	insig
2,6-Octadienoic acid, 3,7-dimethyl-, methyl ester	2349-14-6	Ester	1.67678	1.58252	1.29288	1.2734	1.1526	1.51633	3.68457	1.41463	1.63289	1.51941	1.2714	0.577958	0.247511	insig
2-Bromo dodecane	13187-99-0	Halogenated hydrocarbons	4.20519	4.05909	3.39393	4.08808	3.46413	4.14253	4.09261	2.93849	3.04772	3.83491	4.73526	1.45177	0.000192027	sig
1-Iodoundecane	4282-44-4	Halogenated hydrocarbons	2.51884	2.44154	1.89961	2.18526	2.33585	2.18212	2.28774	1.97819	2.26756	2.62696	1.43069	0.186287	0.00187784	insig
Indole	120-72-9	Heterocyclic compound	29.6074	36.7417	11.4277	9.79774	11.0794	47.1465	23.0923	10.948	4.983	24.2313	14.6164	1.38454	7.22739e-15	sig
1H-Pyrrole-2,5-dione, 3-ethyl-4-methyl-	20189-42-8	Heterocyclic compound	24.6739	17.8445	7.97536	14.5425	26.5178	15.6855	35.9148	30.426	84.4236	59.8946	22.1132	0.816513	2.80035e-13	insig
2(1H)-Pyridinone	142-08-5	Heterocyclic compound	6.89755	4.25657	1.1901	5.48829	2.603	2.74884	5.88268	6.03295	13.8319	6.88948	2.25367	1.66489	6.04386e-19	sig
Ethanone, 1-(2-pyridinyl)-	1122-62-9	Heterocyclic compound	6.72686	5.51791	2.52902	3.13724	2.97678	6.04383	4.13528	5.03933	6.15531	17.1342	3.87028	0.607044	1.7475e-15	insig
Meperidine	57-42-1	Heterocyclic compound	5.69464	5.72867	5.78445	5.47648	4.89124	5.45789	8.78618	5.8293	6.18634	6.09866	4.82834	0.368702	0.0552075	insig
Piperidin-3-one, 2,2,5-methyl-	103634-57-7	Heterocyclic compound	5.47571	5.10718	1.96942	4.75613	4.34698	5.13279	4.15532	1.8258	1.48102	4.6366	3.27351	1.42316	5.23744e-13	sig
Cannabinol	521-35-7	Heterocyclic compound	5.38551	4.3655	5.52876	4.51157	3.94534	4.27027	4.79387	5.1421	4.52112	4.03305	5.567	0.340406	0.0314547	insig
1H-Pyrrole-2,5-dione, 3-ethenyl-4-methyl-	21494-57-5	Heterocyclic compound	4.7401	3.38047	8.39269	12.3028	45.9289	22.014	50.2778	24.948	39.8675	42.876	24.7164	1.07307	3.35013e-11	sig
2H-Pyran-2-one, tetrahydro-6-nonyl-	2721-22-4	Heterocyclic compound	2.09062	1.93898	1.69992	2.01294	1.91896	1.95849	2.88684	1.66884	1.5186	2.41215	1.57448	1.41774	0.00531397	sig
1,4 Benzodioxan-6-amine	22013-33-8	Heterocyclic compound	1.67019	1.53538	1.59911	1.72145	2.04658	1.54239	2.31485	3.28325	4.90967	3.00005	1.55167	1.50465	2.5813e-14	sig
[1,3]Dioxolo[4,5-j]phenanthridine	224-11-3	Heterocyclic compound	1.40065	1.12026	1.48017	1.20103	1.07927	1.10698	1.28583	1.56426	1.17753	1.14882	1.56102	0.400386	0.0239899	insig
Pentadecane	629-62-9	Hydrocarbons	19.2163	17.8975	13.759	18.6674	15.9665	18.2469	17.5167	12.1534	12.8353	16.0246	14.6603	1.09902	2.57324e-06	sig
3,5-Dimethyldodecane	107770-99-0	Hydrocarbons	16.2637	15.0797	10.3467	14.4721	13.1974	15.0289	13.1699	9.75156	10.7868	13.4945	10.9683	0.783091	3.18463e-07	insig
Decane, 5-methyl-	13151-35-4	Hydrocarbons	11.1753	10.112	5.57973	9.54837	8.5062	10.3519	8.39034	5.36412	5.99911	9.85777	6.57438	1.00659	3.83014e-07	sig
Tetradecane, 2-methyl-	1560-95-8	Hydrocarbons	10.7985	10.2024	4.79848	10.1688	8.56054	9.84395	9.15716	4.10715	4.11489	9.67103	8.91709	1.56006	6.94741e-13	sig
Dodecane, 4,6-dimethyl-	61141-72-8	Hydrocarbons	8.25051	7.77625	6.99215	6.64038	5.98578	7.25696	7.87672	6.70783	7.85177	6.43246	5.96351	0.68744	0.079637	insig
Dodecane, 3-methyl-	17312-57-1	Hydrocarbons	8.18435	7.95631	2.63149	7.49901	6.64661	8.31519	6.26108	2.36966	1.95288	6.21541	5.48885	1.4718	1.1096e-13	sig
Tetradecane	629-59-4	Hydrocarbons	5.22524	5.61964	5.03143	7.31185	6.91424	4.69514	4.16362	4.12554	3.05378	5.41842	4.53121	0.455862	4.2977e-12	insig
Dodecane	112-40-3	Hydrocarbons	4.4012	4.66502	5.00804	6.51713	6.38454	3.80253	3.44977	4.15214	3.8826	3.96543	2.57895	0.714091	4.94406e-11	insig
Heptadecane, 2-methyl-	1560-89-0	Hydrocarbons	4.2006	4.04591	4.1406	4.04539	3.72986	3.7603	6.28424	4.04215	4.44432	3.73481	2.99413	0.0817359	0.0360867	insig
1,7-Nonadiene, 4,8-dimethyl-	62108-28-5	Hydrocarbons	3.95395	3.06454	1.12643	1.71762	1.46632	1.35823	1.49277	1.14961	1.31986	2.14112	1.44345	0.509666	0.00708507	insig
Eicosane, 7-hexyl-	55333-99-8	Hydrocarbons	3.73251	3.30064	3.62345	3.34201	3.27581	2.48457	2.80393	3.24203	1.95576	4.29129	2.77668	0.189894	0.00317062	insig
Tridecane, 2-methyl-	1560-96-9	Hydrocarbons	3.20346	3.11573	1.33444	3.10159	2.68838	3.09811	2.56476	1.1185	1.17801	2.98261	2.35805	1.48861	2.08939e-12	sig
Dodecane, 2,6,10-trimethyl-	3891-98-3	Hydrocarbons	3.19902	3.10797	1.39052	3.1046	2.79347	3.09939	2.56607	1.01769	1.17454	3.0049	2.35805	1.52179	3.4221e-12	sig
1,3,5-Cycloheptatriene	544-25-2	Hydrocarbons	3.16676	3.04634	3.68254	3.08489	2.97914	2.39865	2.52195	2.57546	2.55257	3.27914	2.63775	0.262027	0.0039581	insig
Hexadecane	544-76-3	Hydrocarbons	2.45567	2.63305	2.81626	3.85141	3.22413	2.84108	2.14738	2.73345	2.3065	3.33375	3.12901	0.485155	0.000130195	insig
Heptadecane	629-78-7	Hydrocarbons	2.3451	2.19744	1.64839	2.61935	1.94504	2.73684	2.08941	1.24468	1.29625	1.91816	1.88945	1.54068	3.26356e-08	sig
Tetradecane, 2,6,10-trimethyl-	14905-56-7	Hydrocarbons	2.24062	2.24193	1.69658	1.88511	1.98076	2.00836	3.83955	1.71382	1.93492	2.12918	1.23291	0.56987	0.125851	insig
Tridecane	629-50-5	Hydrocarbons	2.21749	2.02606	2.19626	2.60363	1.83968	2.20919	2.05391	1.86705	1.90116	1.8443	1.4572	0.212222	2.54184e-05	insig
Heptane, 2,4-dimethyl-	2213-23-2	Hydrocarbons	2.16278	1.67636	1.2985	1.83686	1.56427	1.94216	1.59828	1.5818	1.47272	1.96635	1.42586	0.479381	0.00537468	insig
Cyclohexene, 4-methyl-1-(1-methylethenyl)-	586-67-4	Hydrocarbons	2.14511	1.39767	1.68188	2.15307	6.4941	3.51477	5.13034	4.8691	9.46543	5.78293	2.55349	0.420587	1.44345e-20	insig
Dodecane, 2,6,11-trimethyl-	31295-56-4	Hydrocarbons	1.53157	1.411	1.01392	1.34404	1.19809	1.34344	1.26765	1.00076	1.13392	2.01919	1.0032	0.777834	0.00294725	insig
Hexacosane	630-01-3	Hydrocarbons	1.23025	1.12718	1.98605	1.6598	1.27173	1.23219	1.16966	1.50859	2.55374	1.64953	1.17852	1.1076	0.0343075	sig
Isophorone	78-59-1	Ketone	29.5094	28.8663	41.2946	42.6645	27.4533	25.1045	11.1719	24.7157	32.4137	28.4142	31.098	1.1359	5.42475e-07	sig
5-Nonen-4-one, 6-methyl-	7036-98-8	Ketone	18.5923	18.5904	28.0129	28.332	17.6394	16.0573	6.47008	16.1892	21.1535	18.3004	20.4145	1.1237	6.10105e-07	sig
Bicyclo[3.1.1]heptan-3-one, 2-hydroxy-2,6,6-trimethyl-	10136-65-9	Ketone	7.64867	7.2299	2.11174	6.48868	5.93227	7.06536	5.75549	1.81104	1.52277	6.48208	4.4897	1.44438	4.46959e-13	sig
3,5,9-Undecatrien-2-one, 6,10-dimethyl-	141-10-6	Ketone	7.49394	10.7752	4.91489	4.40356	6.26057	8.26817	2.69665	7.08697	6.01232	9.2712	1.60551	0.725319	1.31032e-09	insig
3,5-Octadien-2-one	38284-27-4	Ketone	7.01919	4.35328	1.24141	5.63172	2.68129	2.749	5.984	6.19479	14.1329	7.01476	2.22807	1.68169	4.71069e-19	sig
3,5-Octadien-2-one, (E,E)-	30086-02-3	Ketone	6.604	4.32127	5.99825	7.55329	23.3244	12.4428	18.604	16.4622	33.6644	20.8164	8.51117	0.322122	3.97856e-21	insig
1-Penten-3-one, 1-(4-methoxyphenyl)-4-methyl-	103-13-9	Ketone	4.07639	6.1019	2.62465	2.36749	3.23736	4.54716	1.75067	3.79537	3.06021	5.01638	1.0677	0.601218	4.30467e-08	insig
2-Pentadecanone, 6,10,14-trimethyl-	502-69-2	Ketone	3.06631	2.16613	2.23092	2.38617	1.75891	2.26315	3.17586	2.39807	6.3885	4.05496	1.48726	0.920634	0.00621867	insig
4-Methyl-5-nonanone	35900-26-6	Ketone	2.8261	2.25535	1.37791	1.54855	2.20016	1.94848	2.02125	2.07813	2.44035	2.48221	1.42772	0.826398	1.76574e-12	insig
5,9-Undecadien-2-one, 6,10-dimethyl-	689-67-8	Ketone	2.28936	2.20329	1.92471	2.61126	2.03013	1.67036	2.55955	2.9197	4.81873	3.08577	1.455	1.75832	5.26789e-10	sig
5,9-Undecadien-2-one, 6,10-dimethyl-, (E)-	3796-70-1	Ketone	1.98	1.78162	1.78371	2.46615	1.93139	1.46655	2.71049	3.1383	4.92478	3.20095	1.24266	1.58018	6.70076e-13	sig
5,9,13-Pentadecatrien-2-one, 6,10,14-trimethyl-, (E,E)-	1117-52-8	Ketone	1.88826	1.71632	1.33722	1.78632	1.65869	1.5616	2.2656	1.64497	2.68183	2.66604	1.27147	0.261046	0.0358237	insig
Butanoic acid, anhydride	106-31-0	Others	24.2441	17.9755	8.88787	10.0587	20.7448	16.5473	20.1403	23.2158	26.4205	25.6807	12.6063	0.771751	2.46584e-18	insig
Phenol, 2-nitro-	88-75-5	Phenol	17.0862	17.039	26.0115	26.512	16.3069	14.875	6.08249	15.0042	19.4694	17.032	18.9412	1.09244	4.22113e-07	sig
Phenol, 4-octyl-	1806-26-4	Phenol	3.39095	2.74762	1.72928	2.06213	2.62704	2.11182	2.95832	2.67195	4.60127	4.53244	1.69738	0.489387	0.56167	insig
(E)-4-(3-Hydroxyprop-1-en-1-yl)-2-methoxyphenol	32811-40-8	Phenol	2.67923	2.54317	2.28808	2.36695	2.83634	2.5007	2.59949	3.32321	2.20863	2.56012	1.45516	0.506912	0.0202483	insig
Furan, 2-[(methyldithio)methyl]-	57500-00-2	Sulfur compounds	2.02377	1.71036	1.21524	1.25557	2.27079	1.60624	2.31855	2.92785	2.93845	2.36725	1.2084	1.14392	7.04294e-16	sig
3-Cyclohexen-1-ol, 1-methyl-4-(1-methylethyl)-	586-82-3	Terpenoids	41.4538	40.5083	60.1869	61.835	38.7602	35.5247	14.9555	35.5479	46.1206	40.1876	45.0292	1.11698	3.12167e-07	sig
4-Isopropyl-1-methylcyclohex-2-enol	619-62-5	Terpenoids	17.1392	17.0386	26.0115	26.6432	16.5545	15.0096	6.14838	15.1664	19.633	17.032	19.3296	1.08608	4.88374e-07	sig
2-Cyclohexen-1-ol, 1-methyl-4-(1-methylethyl)-, trans-	29803-81-4	Terpenoids	16.9741	16.7832	25.4931	23.3375	15.242	13.7808	5.68354	14.7869	19.494	16.9142	18.6084	1.23984	1.93346e-07	sig
Bicyclo[2.2.1]heptane, 2-chloro-1,7,7-trimethyl-, (1R-endo)-	30462-53-4	Terpenoids	16.5023	11.9962	5.78604	6.75497	14.9365	11.5579	14.7249	16.938	19.5333	19.3607	8.76761	0.659034	3.53209e-18	insig
Limonene	138-86-3	Terpenoids	15.4943	9.79868	4.67149	4.95891	3.20212	2.59814	5.21451	4.1833	6.51735	6.54855	3.48928	1.1284	0.00153029	sig
Limonene oxide, cis-	13837-75-7	Terpenoids	13.6047	13.5805	20.7117	21.1258	13.1108	11.9262	4.83484	12.0169	15.5262	13.4626	15.2773	1.0877	4.72255e-07	sig
1(2H)-Naphthalenone, 3,4,4a,5,6,7-hexahydro-4a,5-dimethyl-3-(1-methylethenyl)-, [3S-(3α,4aα,5α)]-	562-23-2	Terpenoids	13.2352	12.4018	11.4882	11.7784	13.7578	12.3321	12.8138	16.1371	11.2484	12.9024	12.2326	0.219565	0.3525	insig
7-Acetyl-2-hydroxy-2-methyl-5-isopropylbicyclo[4.3.0]nonane	96093-81-1	Terpenoids	11.2043	10.6316	9.74353	9.98907	11.7133	10.6535	11.6579	14.3662	9.71871	11.2957	11.0335	0.090969	0.255752	insig
Furan, 3-(4,8-dimethyl-3,7-nonadienyl)-, (E)-	23262-34-2	Terpenoids	7.65107	11.148	4.83308	4.68585	6.42506	8.6296	3.18475	7.06702	5.9351	9.47968	1.59594	0.609602	4.03855e-09	insig
(3E,7E)-4,8,12-Trimethyltrideca-1,3,7,11-tetraene	62235-06-7	Terpenoids	7.24313	10.3444	4.30638	4.04807	5.79999	7.82679	2.92249	6.69564	5.53694	8.5981	1.61067	0.679889	4.63129e-09	insig
Eremophilene	10219-75-7	Terpenoids	6.85385	5.6381	3.12595	3.7442	6.08125	4.67182	6.68874	8.13771	8.99517	7.01664	5.24464	1.28265	2.99083e-11	sig
[1S-(1α,7α,8aβ)]-1,2,3,5,6,7,8,8a-octahydro-1,4-dimethyl-7-(1-methylethenyl)-Azulene	3691-11-0	Terpenoids	6.79452	5.46478	3.05126	3.71085	5.90132	4.63917	6.44036	8.04137	8.81072	6.97242	5.14584	1.28113	2.0138e-12	sig
2,7-Octadiene-1,6-diol, 2,6-dimethyl-, (E)-	75991-61-6	Terpenoids	5.27191	4.95345	5.53123	4.21121	4.35811	4.27997	4.73438	5.9092	7.57148	5.132	3.92569	2.07787	4.91708e-07	sig
α-Muurolene	10208-80-7	Terpenoids	5.17104	4.25912	2.4231	2.81875	4.63891	3.7044	5.10111	6.34832	6.20856	5.54409	4.3431	1.00416	1.14461e-11	sig
[1α,4aα,8aα]-1,2,4a,5,6,8a-hexahydro-4-7-dimethyl-1-[1-methylethyl]naphthalene	31983-22-9	Terpenoids	5.17058	4.22444	2.4231	2.81826	4.57438	3.51477	4.85515	5.98073	6.13481	4.99658	4.12287	1.2423	6.81365e-12	sig
1,3-Cyclohexadiene, 5-(1,5-dimethyl-4-hexenyl)-2-methyl-, [S-(R*,S*)]-	495-60-3	Terpenoids	4.40962	3.62669	2.20482	2.45788	3.9994	3.23211	4.33152	5.35477	5.11484	4.53701	3.67965	1.00693	1.93204e-10	sig
Cyclopropanecarboxylic Acid, 2,2-dimethyl-3-(2-methyl-1-propenyl)-, (1R-trans)-	4638-92-0	Terpenoids	4.40458	3.80613	1.80747	1.88285	4.09906	2.40513	2.61822	4.91189	5.88159	4.21048	1.74567	1.90549	1.80627e-12	sig
Benzene, 1-(1,5-dimethyl-4-hexenyl)-4-methyl-	644-30-4	Terpenoids	4.27811	3.49665	1.94466	2.24531	3.92505	2.84288	4.04662	4.7486	4.83183	4.06421	3.22451	1.12697	5.79699e-11	sig
Ledol	577-27-5	Terpenoids	4.0765	6.10458	2.62801	2.38524	3.23938	4.5547	1.75877	3.81821	3.0888	5.068	1.09783	0.599056	4.71602e-08	insig
β-Elemen	515-13-9	Terpenoids	3.33625	3.28228	3.16137	3.0621	3.17828	3.13606	3.08268	3.17452	3.13948	3.13143	2.83631	1.24285	2.53263e-10	sig
Cyclohexane, 1-ethenyl-1-methyl-2,4-bis(1-methylethenyl)-, (1α,2β,4β)-	33880-83-0	Terpenoids	3.3252	3.28205	3.1412	3.03006	3.1611	3.10425	3.07945	3.13956	3.09756	3.6943	2.84667	0.142106	0.000163104	insig
2-Penten-1-ol, 2-methyl-5-(2-methyl-3-methylenebicyclo[2.2.1]hept-2-yl)-, [1S-[1α,2α(E),4α]]-	37172-32-0	Terpenoids	1.96886	1.92975	1.75945	1.74903	2.10065	1.80998	2.00264	2.3519	1.80185	1.62138	2.7598	0.0902677	0.0744811	insig
2,6,10-Dodecatrien-1-ol, 3,7,11-trimethyl-	4602-84-0	Terpenoids	1.92623	1.82076	1.58754	1.87448	1.62982	1.83557	2.30857	1.48559	1.55604	1.8676	1.43908	1.01586	0.0183761	sig
