# Supplementary material for: Variations of main quality components of matcha from different regions in the Chinese market
Source: Front Nutr. 2023 Mar 9;10:1153983. doi: 10.3389/fnut.2023.1153983 (PMC10034323; doi:10.3389/fnut.2023.1153983)
Supplement: Supplementary file 4 [file Table_4.XLSX]

## Sheet: GroupⅠ
Compounds	Class	CAS	M2.Score Contrib(Group - Average), Weight=p1p2	VIP	Odor quality	Characteristic volatile components
Linoelaidic Acid	Acid	506-21-8	0.712989	0.979147	/	-
Gamolenic Acid	Acid	506-26-3	0.628687	0.792979	/	-
3,7,11-Trimethyl-dodeca-2,6,10-trienoic Acid	Acid	7548-13-2	0.345745	1.04714	/	√
Benzeneacetic acid	Acid	103-82-2	0.013893	0.550807	sweet honey floral,waxy	-
2-Dibenzofuranol	Alcohol	86-77-1	0.0415448	1.35169	/	√
1-Octanol	Alcohol	111-87-5	0.350301	0.572371	waxy green	-
2-Propen-1-ol, 3-phenyl-	Alcohol	104-54-1	0.0804024	0.496937	sweet balsamic green powdery	-
2-Propen-1-ol, 3-phenyl-, (E)-	Alcohol	4407-36-7	0.0771923	0.486071	sweet balsamic green powdery	-
trans-Sinapyl Alcohol	Alcohol	20675-96-1	0.0384078	0.254845	/	-
BenzAldehyde, 3-hydroxy-	Aldehyde	100-83-4	1.41161	1.65887	/	√
2-Nonen-1-ol	Alcohol	22104-79-6	0.00107287	0.0709442	sweet fatty melon	-
BenzeneacetAldehyde, α-methyl-4-(2-methylpropyl)-	Aldehyde	51407-46-6	0.795194	1.12904	/	√
BenzAldehyde, 2-ethyl-	Aldehyde	22927-13-5	0.351335	1.59064	/	√
2,6-dihydroxy-Benzoic Acid	Aromatics	303-07-1	1.16208	1.54693	/	√
Benzene, (1-methyl-1-propylpentyl)-	Aromatics	54932-91-1	1.1033	1.26361	/	√
Hexadecanal	Aldehyde	629-80-1	0.655645	0.982548	cardboard	-
3,5-Dimethoxy-4-hydroxycinnamAldehyde	Aldehyde	87345-53-7	0.554456	0.806648	/	-
Benzene, [1-[[1-(1-methylethyl)-3-butenyl]oxy]ethyl]-, [S-(R*,R*)]-	Aromatics	98088-51-8	0.959461	1.16675	/	√
2-Dodecenal, (E)-	Aldehyde	20407-84-5	0.366105	0.927696	herbal,citrus, metallic	-
Tetradecanal	Aldehyde	124-25-4	0.358568	0.984448	/	-
Urea, N-(2-methylcyclohexyl)-N'-phenyl-	Aromatics	1982-49-6	0.866251	1.14421	/	√
1-Cyclohexene-1-carboxAldehyde, 4-(1-methylethenyl)-, (S)-	Aldehyde	18031-40-8	0.0605502	0.617959	herbal,fresh green,grassy fatty	-
(E)-2-Decenal	Aldehyde	3913-81-3	0.00023409	0.0429775	waxy fatty earthy green	-
Prilocaine	Amine	721-50-6	0.630704	0.751153	/	-
3-Pyridinecarboxamide, 1,6-dihydro-1-methyl-6-oxo-	Amine	701-44-0	0.539238	0.775156	/	-
1,3-BenzenediAmine, 4-methyl-5-nitro-	Amine	6629-29-4	0.397593	0.595106	/	-
Lidocaine	Amine	137-58-6	0.122895	0.493518	/	-
1-OctanAmine,N-methyl-	Amine	2439-54-5	0.117523	0.525486	/	-
BenzenAmine, 4,4'-methylenebis-	Amine	101-77-9	0.011533	0.101512	/	-
9-Hexadecenoic acid, methyl ester, (Z)-	Ester	1120-25-8	1.26483	1.07546	/	√
9,12,15-Octadecatrienoic acid, methyl ester, (Z,Z,Z)-	Ester	301-00-8	0.848065	1.19769	/	√
2-Piperidinimine	Heterocyclic compound	22780-54-7	1.2567	1.43537	/	√
Carbamic acid, (1-methylethyl)-, 2-[[(aminocarbonyl)oxy]methyl]-2-methylpentyl ester	Heterocyclic compound	78-44-4	1.13412	1.03841	/	√
7(1H)-Pteridinone	Heterocyclic compound	2432-27-1	0.898735	1.28721	/	√
Hexobarbital	Heterocyclic compound	56-29-1	0.453615	1.05417	/	√
EMDP	Aromatics	102177-18-4	0.214049	0.723618	/	-
Phenol, 4-(2-propenyl)-	Aromatics	501-92-8	0.175933	0.443788	phenolic medicinal herbal	-
2-Acetoxyacetophenone	Aromatics	7250-94-4	0.116542	0.601453	/	-
4-Acetylaminobiphenyl	Aromatics	4075-79-0	0.0478539	0.578409	/	-
Amitriptyline	Aromatics	50-48-6	0.034177	0.319733	/	-
1H-Indole-3-acetonitrile	Heterocyclic compound	771-51-7	0.348654	1.25148	/	√
Dodecane, 4-methyl-	Hydrocarbons	6117-97-1	0.376094	1.26618	/	√
Procaine	Ketone	59-46-1	1.7298	1.95422	/	√
2,5-Cyclohexadiene-1,4-dione, 2,6-bis(1,1-dimethylethyl)-	Ketone	719-22-2	0.31234	1.22124	/	√
2,6,10-Dodecatrien-1-ol, 3,7,11-trimethyl-, (Z,E)-	Terpenoids	3790-71-4	1.37078	1.41907	/	√
Z,Z-4,15-Octadecadien-1-ol acetate	Ester	86252-67-7	0.657986	0.944938	/	-
2,6,10-Dodecatrien-1-ol, 3,7,11-trimethyl-, acetate, (E,E)-	Ester	4128-17-0	0.627663	0.749896	waxy	-
Butyl caprylate	Ester	589-75-3	0.5107	0.675395	buttery ethereal herbal	-
(Z)-1-Methyl-4-(6-methylhept-5-en-2-ylidene)cyclohex-1-ene	Terpenoids	13062-00-5	1.36421	1.27737	/	√
Butanoic acid, 4-hexenyl ester, (Z)-	Ester	69727-41-9	0.402259	0.755725	/	-
Propanoic acid, 2-methyl-, 3-phenylpropyl ester	Ester	103-58-2	0.344002	0.749548	fruity,honey	-
2-methylprop-2-enoyl 2-methylprop-2-enoate	Ester	760-93-0	0.321048	0.684411	/	-
Benzoic acid, 2-(dimethylamino)-, methyl ester	Ester	10072-05-6	0.309691	0.681559	fruity,orange	-
Benzoic acid, 2-propenyl ester	Ester	583-04-0	0.20369	0.554898	fruity,sweet floral	-
Octanoic acid, 3-hexenyl ester, (Z)-	Ester	61444-41-5	0.182902	0.554521	green,fruity	-
(1R,5S,6R)-2,7,7-Trimethylbicyclo[3.1.1]hept-2-en-6-yl acetate	Ester	67999-48-8	0.0812469	0.383968	/	-
Felbamate	Ester	25451-15-4	0.0374741	0.32778	/	-
Linalyl acetate	Ester	115-95-7	0.03483	0.164141	herbal,sweet green citrus	-
2-Butenoic acid, 3-hexenyl ester, (E,Z)-	Ester	65405-80-3	0.00106953	0.0980688	green vegetable	-
(R)-2-((4aS,8aR)-4a-Methyl-8-methylene-1,4,4a,5,6,7,8,8a-octahydronaphthalen-2-yl)propan-1-ol	Terpenoids	28102-68-3	0.909893	1.33712	/	√
cis-α-Bisabolene	Terpenoids	29837-07-8	0.794336	1.05707	/	√
(1S,4S,4aR)-1-Isopropyl-4-methyl-7-methylene-1,2,3,4,4a,5,6,7-octahydronaphthalene	Terpenoids	157477-72-0	0.77686	1.0927	/	√
3,7,11,15-Tetramethyl-2-hexadecen-1-ol	Terpenoids	102608-53-7	0.766187	1.19693	/	√
1-methyl-4-(1,2,2-trimethylcyclopentyl)cyclohexa-1,3-diene	Terpenoids	29621-78-1	0.439945	1.2096	/	√
Ethanol, 2-(3,3-dimethylcyclohexylidene)-, (Z)-	Terpenoids	26532-23-0	0.382655	1.0164	/	√
Thiophene, 2-dodecyl-	Heterocyclic compound	4861-61-4	0.639822	0.753685	/	-
Benzene, 1-methyl-4-(1,2,2-trimethylcyclopentyl)-, (R)-	Terpenoids	16982-00-6	0.0766955	1.21372	/	√
2,6-Piperidinedione, 3-ethyl-	Heterocyclic compound	25115-69-9	0.32636	0.531883	/	-
4-Pyridinecarboxamide	Heterocyclic compound	1453-82-3	0.291824	0.738945	/	-
Pyrazine, 2-ethyl-3,5-dimethyl-	Heterocyclic compound	13925-07-0	1.21133	1.81178	almond,roasted,nutty	√
Acridine	Heterocyclic compound	260-94-6	0.111778	0.698074	/	-
2-((3,3-Dimethyloxiran-2-yl)methyl)-3-methylfuran	Heterocyclic compound	92356-06-4	0.030414	0.244146	green earthy citrus	-
1-Pentanone, 1-(2-furanyl)-	Heterocyclic compound	3194-17-0	0.0219015	0.245768	sweet caramellic	-
(3R,6R)-2,2,6-Trimethyl-6-vinyltetrahydro-2H-pyran-3-ol	Heterocyclic compound	14009-71-3	0.00148769	0.0579364	citrus green	-
4-(1,5-dimethyl-1,4-hexadienyl)-1-methyl-Cyclohexene	Terpenoids	17627-44-0	1.3355	1.26411	balsamic spicy floral	√
1-Nonadecene	Hydrocarbons	18435-45-5	0.681364	0.776828	/	-
Nonadecane	Hydrocarbons	629-92-5	0.615544	0.744115	bland	-
Pentanoic acid, 1-ethenyl-1,5-dimethyl-4-hexenyl ester	Ester	10471-96-2	0.0822658	1.34908	fruity citrus	√
Heptadecane	Hydrocarbons	629-78-7	0.0634935	0.233357	/	-
Dodecane, 5-methyl-	Hydrocarbons	17453-93-9	0.007322	0.120446	/	-
Phenol, 3-methyl-	Aromatics	108-39-4	0.700877	1.01974	medicinal woody , phenolic	√
4',6'-Dihydroxy-2',3'-dimethylacetophenone	Ketone	7743-14-8	0.549917	0.693139	/	-
o-Hydroxydibenzoylmethane	Ketone	1469-94-9	0.191382	0.557044	/	-
Methaqualone	Ketone	72-44-6	0.17417	0.400133	/	-
2-Butanone, 4-(2,6,6-trimethyl-2-cyclohexen-1-yl)-	Ketone	31499-72-6	0.173549	0.644878	woody,floral,fruity,powdery	-
BenzAldehyde, 2,4-dimethyl-	Aldehyde	15764-16-6	0.351454	1.59071	naphthyl cherry almond spicy vanilla	√
Ethanone, 1-(2-methylphenyl)-	Ketone	577-16-2	0.0436603	0.21076	floral,sweet,nutty	-
2(5H)-Furanone, 5-ethyl-3-hydroxy-4-methyl-	Ketone	698-10-2	0.0257079	0.21692	caramellic,sweet fruity, nutty	-
2H-Pyran-2-one, tetrahydro-6-methyl-	Ketone	823-22-3	0.013463	0.830724	herbal,fruity	-
4-Isopropyl-1,3-cyclohexanedione	Ketone	62831-62-3	0.00337219	0.112242	/	-
7-Oxabicyclo[4.1.0]heptan-2-one, 6-methyl-3-(1-methylethyl)-	Ketone	5286-38-4	0.00175906	0.126046	/	-
Benzene, (1-nitropropyl)-	Nitrogen compounds	5279-14-1	0.259707	0.706592	/	-
Catechol	Phenol	120-80-9	0.0292663	0.815854	/	-
Phenol, 4-propyl-	Phenol	645-56-7	0.0132815	0.161248	medicinal phenolic	-
Pyrazine, 3,5-diethyl-2-methyl-	Heterocyclic compound	18138-05-1	1.84067	1.95716	nutty meaty vegetable	√
2-Acetyl-3-methylpyrazine	Heterocyclic compound	23787-80-6	1.36286	1.8494	nutty,roasted	√
9,12,15-Octadecatrienoic acid, methyl ester	Ester	7361-80-0	0.903787	1.22241	oily fatty fruity	√
9,12-Octadecadienoic acid (Z,Z)-, methyl ester	Ester	112-63-0	0.741478	1.19823	oily fatty woody	√
Benzoic Acid, 4-hydroxy-	Aromatics	99-96-7	0.266906	1.10662	phenolic nutty	√
Decanal	Aldehyde	112-31-2	1.5315	1.46826	sweet,waxy ,citrus,floral	√
(1R,9R,E)-4,11,11-Trimethyl-8-methylenebicyclo[7.2.0]undec-4-ene	Terpenoids	68832-35-9	0.716336	0.951877	/	-
8-(2,6-Dimethyl-hepta-1,5-dienyl)-3,7,7-trimethyl-bicyclo[4.2.0]oct-2-ene	Terpenoids	113725-56-7	0.455075	0.633934	/	-
Bicyclo[7.2.0]undec-4-ene, 4,11,11-trimethyl-8-methylene-,[1R-(1R*,4Z,9S*)]-	Terpenoids	118-65-0	0.43658	0.955375	woody spicy	-
Naphthalene, 1,2,3,5,6,8a-hexahydro-4,7-dimethyl-1-(1-methylethyl)-, (1S-cis)-	Terpenoids	483-76-1	1.12998	1.20252	thyme herbal woody	√
13-Octadecenal, (Z)-	Aldehyde	58594-45-9	0.404897	1.13082	waxy	√
Eicosane	Hydrocarbons	112-95-8	0.816455	1.44227	waxy	√
Hexadecanoic acid, methyl ester	Ester	112-39-0	0.671965	1.63765	waxy fatty orris	√
1-Hexadecanol	Alcohol	36653-82-4	1.31507	1.43918	waxy,clean, floral	√
(1α,4aβ,8aα)-1,2,3,4,4a,5,6,8a-octahydro-7-methyl-4-methylene-1-(1-methylethyl)-Naphthalene	Terpenoids	39029-41-9	0.318453	0.524378	herbal woody	-
Cyclohexanol, 3-ethenyl-3-methyl-2-(1-methylethenyl)-6-(1-methylethyl)-, [1R-(1α,2α,3β,6α)]-	Terpenoids	35727-45-8	0.300846	0.785517	/	-
(3S,3aR,3bR,4S,7R,7aR)-4-Isopropyl-3,7-dimethyloctahydro-1H-cyclopenta[1,3]cyclopropa[1,2]benzen-3-ol	Terpenoids	23445-02-5	0.265387	0.474805	spicy minty	-
Bicyclo[5.2.0]nonane, 2-methylene-4,8,8-trimethyl-4-vinyl-	Terpenoids	242794-76-9	0.242838	0.643116	/	-
(1R,4aR,4bR,10aR)-7-Isopropyl-1,4a-dimethyl-1,2,3,4,4a,4b,5,6,10,10a-decahydrophenanthrene-1-carbaldehyde	Terpenoids	6704-50-3	0.206565	0.796057	/	-
Muurola-4,10(14)-dien-1β-ol	Terpenoids	257293-90-6	0.098502	0.99122	/	-
(1R,3aS,4aS,8aS)-1,4,4,6-Tetramethyl-1,2,3,3a,4,4a,7,8-octahydrocyclopenta[1,4]cyclobuta[1,2]benzene	Terpenoids	94535-52-1	0.0830688	0.297135	/	-
Bicyclo[2.2.1]heptan-2-ol, 1,7,7-trimethyl-, (1S-endo)-	Terpenoids	464-45-9	0.0736028	0.380882	balsamic,woody	-
(4aR-trans)-decahydro-4a-methyl-1-methylene-7-(1-methylethylidene)-Naphthalene	Terpenoids	515-17-3	0.0312104	1.06115	woody	√
Carvone oxide, trans-	Terpenoids	39903-97-4	0.0024252	0.035036	/	-
(-)-Carvone	Terpenoids	6485-40-1	2.28369e-05	0.0909123	minty,sweet,herbal	-
Carvenone	Terpenoids	499-74-1	1.72151e-05	0.0413181	minty,spearmint	-
The odor quality of compounds were taken from http://www.thegoodscentscompany.com/
“/”Indicates that no aroma related information is found
“-” indicates that the substance is not a characteristic aroma component

## Sheet: Group Ⅱ
Compounds	Class	CAS	M2.Score Contrib(Group - Average), Weight=p1p2	VIP	Odor quality	Characteristic volatile components
7-Oxabicyclo[4.1.0]heptane, 1-methyl-4-(1-methylethenyl)-	Terpenoids	1195-92-2	0.423212	1.02412	citrus fresh clean minty spearmint herbal	√
Cyclohexanepropanoic Acid, 2-propenyl ester	Acid	2705-87-5	1.10328	1.04589	fruity,sweet waxy	√
3-Pentenoic Acid, 2,2-dimethyl-	Acid	16642-52-7	1.65594	1.39371	/	√
Benzeneacetic Acid, 4-hydroxy-	Acid	156-38-7	1.21783	1.39268	/	√
2-Propenoic Acid, 3-(2-hydroxyphenyl)-	Acid	583-17-5	1.31335	1.18819	/	√
Pentadecanoic Acid	Acid	1002-84-2	0.933129	1.16541	/	√
Neric Acid	Acid	4613-38-1	1.49263	1.14008	/	√
2-Propenoic Acid, 3-(3-hydroxyphenyl)-	Acid	588-30-7	1.07068	1.12313	/	√
Hippuric Acid	Acid	495-69-2	1.35719	1.12009	/	√
Patulin	Alcohol	149-29-1	1.26934	1.36205	/	√
2-Dibenzofuranol	Alcohol	86-77-1	0.999005	1.35169	/	√
Undecanoic Acid	Acid	112-37-8	0.90741	0.89717	waxy creamy cheesy fatty coconut	-
2-Propenoic Acid, 3-phenyl-	Acid	621-82-9	0.216598	0.846926	balsamic sweet storax cinnamyl	-
2-Octenoic Acid	Acid	1470-50-4	0.563837	0.729302	/	-
Benzenepropanoic Acid, 4-hydroxy-	Acid	501-97-3	0.303111	0.609925	/	-
Homovanillic Acid	Acid	306-08-1	0.337888	0.593842	/	-
Erucic Acid	Acid	112-86-7	0.385588	0.584061	/	-
Benzeneacetic acid	Acid	103-82-2	0.178317	0.550807	sweet honey floral honeysuckle sour waxy civet	-
Lavandulyl caproate	Acid	59550-36-6	0.327567	0.549656	/	-
Salicylic Acid	Acid	69-72-7	0.182168	0.440082	phenolic nutty	-
Tryptophol	Alcohol	526-55-6	1.6376	1.26046	/	√
1,2-Benzenedimethanol	Alcohol	612-14-6	1.46522	1.25467	/	√
Benzenemethanol, α-2-propenyl-	Alcohol	936-58-3	1.45896	1.2476	/	√
3,4-Dimethylcyclohexanol	Alcohol	5715-23-1	1.34823	1.22453	/	√
cis-9-Tetradecen-1-ol	Alcohol	35153-15-2	1.36311	1.2149	/	√
Benzenemethanol, α-2-cyclohexen-1-yl-	Alcohol	5723-89-7	1.61666	1.20419	/	√
1-Pentanol, 5-[(tetrahydro-2H-pyran-2-yl)oxy]-	Alcohol	76102-74-4	1.56462	1.17248	/	√
2,6-Octadien-1-ol, 3,7-dimethyl-	Alcohol	624-15-7	1.0569	1.06957	/	√
2-Cyclopentylethanol	Alcohol	766-00-7	1.21767	1.03832	/	√
n-Pentadecanol	Alcohol	629-76-5	0.815692	1.02841	/	√
Benzenemethanol, 3-hydroxy-	Alcohol	620-24-6	0.91458	1.01476	/	√
BenzAldehyde, 2-ethyl-	Aldehyde	22927-13-5	1.21136	1.59064	/	√
3,5-di-tert-Butyl-4-hydroxybenzAldehyde	Aldehyde	1620-98-0	1.15541	1.29115	/	√
BenzAldehyde, 2,4-dihydroxy-3,6-dimethyl-	Aldehyde	34883-14-2	1.44822	1.15598	/	√
2,5-FurandicarboxAldehyde	Aldehyde	823-82-5	1.03549	1.00845	/	√
Acetamide, N-(2,6-dimethylphenyl)-2-(ethylamino)-	Amine	7728-40-7	1.74972	1.43691	/	√
Acetamide, N-phenyl-	Amine	103-84-4	1.87394	1.32266	/	√
1-ButanAmine, N-(2-pyridinylmethylene)-	Amine	7032-24-8	1.75497	1.30742	/	√
3-phenoxy-Benzenemethanol	Alcohol	13826-35-2	0.0603269	0.939494	/	-
1H-3a,7-Methanoazulen-5-ol, octahydro-3,8,8-trimethyl-6-methylene-	Alcohol	28231-03-0	0.13216	0.911046	cedarwood woody sweet	-
1-Tetradecanol	Alcohol	112-72-1	0.343538	0.722364	fruity waxy orris coconut	-
3,5-Dihydroxy-4'-methoxydiphenyl	Alcohol	54960-96-2	0.512412	0.684091	/	-
trans,cis-2,6-Nonadien-1-ol	Alcohol	28069-72-9	0.406001	0.672745	green cucumber oily violet leaf	-
3-Cyclohexen-1-ol, 1-(1,5-dimethyl-4-hexenyl)-4-methyl-	Alcohol	15352-77-9	0.393569	0.663706	citrus floral fresh sweet herbal	-
Benzenepropanol, 4-hydroxy-3-methoxy-	Alcohol	2305-13-7	0.340648	0.633183	/	-
2-Propen-1-ol, 3-phenyl-	Alcohol	104-54-1	0.0850953	0.496937	sweet balsamic green powdery	-
2-Propen-1-ol, 3-phenyl-, (E)-	Alcohol	4407-36-7	0.0817438	0.486071	sweet balsamic green powdery	-
1-Nonanol	Alcohol	143-08-8	0.142471	0.386285	floral fresh clean fatty rose orange dusty	-
2-Decen-1-ol, (E)-	Alcohol	18409-18-2	0.137925	0.343394	waxy ozone citrus rose rummy rue	-
(E)-2,6-Dimethylocta-5,7-dien-2-ol	Alcohol	7643-60-9	0.101759	0.325432	/	-
trans-Sinapyl Alcohol	Alcohol	20675-96-1	0.01382	0.254845	/	-
2-Nonen-1-ol	Alcohol	22104-79-6	0.00247943	0.0709442	sweet fatty melon cucumber vegetable	-
Benzeneacetamide	Amine	103-81-1	0.998159	1.28134	/	√
GrAmine	Amine	87-52-5	1.3306	1.27546	/	√
NonylAmine, 1-heptyl-	Amine	24539-83-1	1.64873	1.26753	/	√
5-Phenyl-o-anisidine	Amine	39811-17-1	1.46685	1.23655	/	√
BenzenAmine, 2,5-dimethyl-	Amine	95-78-3	0.827137	1.18248	/	√
Diethylpropion	Amine	90-84-6	1.44273	1.12903	/	√
1,1'-Biphenyl, 4-(1-methylethyl)-	Aromatics	7116-95-2	1.52904	1.41935	/	√
Methane, di-p-tolyl-	Aromatics	4957-14-6	1.22235	1.39283	/	√
2,5-di-tert-Butyl-1,4-benzoquinone	Aromatics	2460-77-7	1.17826	1.35693	/	√
Benzene, 1-propynyl-	Aromatics	673-32-5	1.56856	1.33099	/	√
Formamide, N-phenyl-	Aromatics	103-70-8	1.29979	1.29143	/	√
Isoelemicin	Aromatics	487-12-7	1.60963	1.21119	/	√
Tetradecanal	Aldehyde	124-25-4	0.17782	0.984448	/	-
2-Dodecenal, (E)-	Aldehyde	20407-84-5	0.189803	0.927696	herbal,citrus, metallic	-
AcetAldehyde, tetramer	Aldehyde	108-62-3	0.387931	0.920572	/	-
3-(4-Hydroxyphenyl)propanal	Aldehyde	20238-83-9	0.716007	0.897258	/	-
3-Cyclohexene-1-carboxAldehyde, 4-(4-hydroxy-4-methylpentyl)-	Aldehyde	31906-04-4	0.514029	0.848711	floral woody	-
3-p-Menthen-7-al	Aldehyde	27841-22-1	0.663164	0.830467	/	-
2-Butenal, 2-methyl-4-(2,6,6-trimethyl-1-cyclohexen-1-yl)-	Aldehyde	3155-71-3	0.171709	0.734564	floral,sweet, nutty , woody	-
4-Hydroxy-2-methylbenzAldehyde	Aldehyde	41438-18-0	0.135674	0.458009	/	-
BenzAldehyde, 4-methoxy-	Aldehyde	123-11-5	0.0293014	0.302413	sweet powdery mimosa floral hawthorn balsamic	-
Nonanal	Aldehyde	124-19-6	0.0117762	0.111169	waxy aldehydic fresh fatty	-
(E)-2-Decenal	Aldehyde	3913-81-3	0.00223575	0.0429775	waxy fatty earthy green cilantro mushroom aldehydic fried chicken	-
β-Asarone	Aromatics	5273-86-9	1.19119	1.12656	/	√
Benzene, nitro-	Aromatics	98-95-3	1.05364	1.01433	/	√
N-Benzyloxy-2-carbomethoxyaziridine	Ester	53084-33-6	1.25348	1.3813	/	√
Ethinamate	Ester	126-52-3	1.41061	1.26831	/	√
Ethyl tridecanoate	Ester	28267-29-0	1.05412	1.26096	/	√
Hexanoic acid, 3-hexenyl ester	Ester	84434-19-5	1.67321	1.26042	/	√
Benzoic acid, 3,5-dihydroxy-, methyl ester	Ester	2150-44-9	1.62768	1.25672	/	√
Heptanoic acid, anhydride	Ester	626-27-7	1.14461	1.11291	/	√
3-Methylheptyl acetate	Ester	72218-58-7	0.479211	1.07441	/	√
(S)-4-(1-Acetoxyallyl)phenyl acetate	Ester	52946-22-2	0.802903	1.05171	/	√
Hordenine	Amine	539-15-1	1.01971	0.954934	/	-
N,N-Dimethyl-1,2,3-trithian-5-Amine	Amine	31895-21-3	0.804494	0.94242	/	-
N,N-DimethyltryptAmine	Amine	61-50-7	0.692328	0.802554	/	-
1,6-HexanediAmine, N,N,N',N'-tetramethyl-	Amine	111-18-2	0.455016	0.737109	/	-
BenzenAmine, 2-methyl-3,5-dinitro-	Amine	35572-78-2	0.548242	0.697903	/	-
N,N'-Methylenebismethacrylamide	Amine	2359-15-1	0.455402	0.659089	/	-
1-OctanAmine,N-methyl-	Amine	2439-54-5	0.0444021	0.525486	/	-
1-PhenylcyclohexylAmine	Amine	2201-24-3	0.294	0.52153	/	-
BenzphetAmine	Amine	156-08-1	0.126106	0.472748	/	-
Phosphoric acid, dibutyl 1-methylethenyl ester	Ester	5954-40-5	1.1921	1.04158	/	√
2-Furancarboxylic acid, octyl ester	Ester	39251-88-2	0.836085	1.03988	/	√
Bicyclo[3.1.0]hexan-3-ol, 4-methylene-1-(1-methylethyl)-, acetate	Ester	3536-54-7	1.11842	1.00362	/	√
Butanoic acid, 2-pentenyl ester, (Z)-	Ester	42125-13-3	0.887364	1.00103	/	√
(3-Bromo-1-methylpropoxymethyl)benzene	Halogenated hydrocarbons	51666-29-6	1.11797	1.00652	/	√
1H-Pyrrolo[2,3-b]pyridine, 2-(1-methylethyl)-	Heterocyclic compound	27257-18-7	1.54111	1.28017	/	√
3H-1,2,4-Triazol-3-one, 1,2-dihydro-	Heterocyclic compound	930-33-6	1.67061	1.27012	/	√
1H-Indole-3-acetonitrile	Heterocyclic compound	771-51-7	0.510009	1.25148	/	√
Sesquirosefuran	Heterocyclic compound	39007-93-7	1.07674	1.2184	/	√
Benzofuran, 7-cyclohexyl-2,3-dihydro-2-methyl-	Heterocyclic compound	54815-14-4	1.52242	1.19398	/	√
2,2'-Bifuran, octahydro-	Heterocyclic compound	1592-33-2	1.4878	1.17445	/	√
Thieno[2,3-b]thiophene,2-methyl-	Heterocyclic compound	13393-75-4	0.956451	1.16911	/	√
2(3H)-Benzofuranone, 3-methyl-	Heterocyclic compound	32267-71-3	1.16347	1.15176	/	√
Naphthalene, 1,2-dihydro-4,5,7-trimethyl-	Aromatics	53156-11-9	1.03929	0.968047	/	-
Benzoic Acid, 3,4,5-trihydroxy-	Aromatics	149-91-7	0.726578	0.879095	/	-
1-(3-Methylbutyl)-2,3,5,6-tetramethylbenzene	Aromatics	116761-73-0	0.677467	0.837752	/	-
Benzene, 1,2,3-trimethoxy-5-(1-propenyl)-, (E)-	Aromatics	5273-85-8	0.516188	0.753993	spicy floral	-
Naphthalene, 2,3,6-trimethyl-	Aromatics	829-26-5	0.580981	0.727773	fruity,dry	-
EMDP	Aromatics	102177-18-4	0.143627	0.723618	/	-
Benzene, 1,2,3-trimethyl-	Aromatics	526-73-8	0.448509	0.707503	/	-
1,3-Benzodioxole, 4-methoxy-6-(2-propenyl)-	Aromatics	607-91-0	0.51717	0.698037	spicy warm balsamic woody	-
Benzene, 1-methyl-2-(1-ethylpropyl)-	Aromatics	54410-74-1	0.523701	0.683221	/	-
2-Acetoxyacetophenone	Aromatics	7250-94-4	0.13602	0.601453	/	-
4-Acetylaminobiphenyl	Aromatics	4075-79-0	0.194591	0.578409	/	-
Benzene, 1,2-diethyl-3,4,5,6-tetramethyl-	Aromatics	33884-69-4	0.239623	0.501568	/	-
Amitriptyline	Aromatics	50-48-6	0.0331145	0.319733	/	-
Dehydromevalonic lactone	Aromatics	2381-87-5	0.0702157	0.257354	/	-
Naphthalene, 1,2-dimethyl-	Aromatics	573-98-8	0.0423892	0.246397	/	-
Naphthalene, 1,4-dimethyl-	Aromatics	571-58-4	0.00254797	0.0844057	moldy resinous	-
2-Acetyl-3-methylbenzo[b]thiophene	Heterocyclic compound	18781-31-2	1.09476	1.13497	/	√
2,5-Dibutoxy-2,5-dihydrofuran	Heterocyclic compound	20295-23-2	1.0878	1.09544	/	√
Pyridine, 2,3,4,5-tetrahydro-6-propyl-	Heterocyclic compound	1604-01-9	1.27575	1.07686	/	√
Hexobarbital	Heterocyclic compound	56-29-1	0.210562	1.05417	/	√
8-Hexadecyne	Hydrocarbons	19781-86-3	1.86083	1.3728	/	√
1-Heptadecene	Hydrocarbons	6765-39-5	1.77173	1.31228	/	√
Megastigma-4,6(Z),8(E)-triene	Hydrocarbons	51468-85-0	1.81473	1.27558	/	√
Dodecane, 4-methyl-	Hydrocarbons	6117-97-1	0.611747	1.26618	/	√
Decane, 2,5,9-trimethyl-	Hydrocarbons	62108-22-9	1.31599	1.17149	/	√
1,7-Octadiene, 2,7-dimethyl-3,6-bis(methylene)-	Hydrocarbons	16714-60-6	1.12347	1.03016	/	√
Ethanone, 1-(2-methyl-1-cyclopenten-1-yl)-	Ketone	3168-90-9	1.95806	1.75299	/	√
Ethanone, 1-(1H-pyrazol-4-yl)-	Ketone	25016-16-4	0.736966	1.46239	/	√
1-Pentanone, 1-(p-anisyl)-3-methyl-	Ketone	66333-82-2	1.19342	1.42506	/	√
Methanone, (4-hydroxyphenyl)phenyl-	Ketone	1137-42-4	1.15618	1.3934	/	√
3-Buten-2-one, 4-(4-hydroxy-2,2,6-trimethyl-7-oxabicyclo[4.1.0]hept-1-yl)-	Ketone	38274-01-0	1.77195	1.33355	/	√
2(1H)-Pyridinone, 1-cyclohexyl-3,4,5,6-tetramethyl-	Ketone	82754-44-7	1.10016	1.32941	/	√
6-Methyl-6-(5-methylfuran-2-yl)heptan-2-one	Ketone	50464-95-4	0.972567	1.31136	/	√
1-Pentanone, 1-(4-methylphenyl)-	Ketone	1671-77-8	1.56313	1.27698	/	√
1-Butanone, 2-hydroxy-1-phenyl-	Ketone	16183-46-3	1.51799	1.25243	/	√
2,5-Cyclohexadiene-1,4-dione, 2,6-bis(1,1-dimethylethyl)-	Ketone	719-22-2	0.571286	1.22124	/	√
2,5-Furandione, 3-methyl-4-propyl-	Ketone	16493-20-2	1.63897	1.20521	/	√
1(2H)-Naphthalenone, octahydro-4-hydroxy-, trans-	Ketone	21766-50-7	1.50422	1.15193	/	√
1H-Inden-1-one, 2,3-dihydro-	Ketone	83-33-0	1.09931	1.12802	/	√
5'-Hydroxy-2',3',4'-trimethylacetophenone	Ketone	13667-28-2	1.33198	1.09242	/	√
5-Hepten-2-one, 4,6-dimethyl-	Ketone	31162-48-8	1.10532	1.05018	/	√
Ethanone, 1-(3-hydroxyphenyl)-	Ketone	121-71-1	1.11787	1.03671	/	√
Spiro[4.5]decan-7-one, 1,8-dimethyl-4-(1-methylethyl)-	Ketone	39510-26-4	1.11503	1.0192	/	√
Ethanone, 1-(3-methylphenyl)-	Ketone	585-74-0	1.09714	1.01544	/	√
Dodecanenitrile	Nitrogen compounds	2437-25-4	1.20421	1.19674	/	√
Nonane, 1-iodo-	Others	4282-42-2	1.65209	1.2043	/	√
4-Hexen-1-ol, acetate	Others	72237-36-6	1.38991	1.15194	/	√
1,2,3-Benzenetriol	Phenol	87-66-1	1.94306	1.40942	/	√
Phenol, m-tert-butyl-	Phenol	585-34-2	1.46369	1.1311	/	√
Hibaene	Terpenoids	2359-73-1	1.70702	1.57612	/	√
(1aR,1bS,2aS,5S,5aS,7aS)-2,2,5,7a-Tetramethyldecahydrocyclopenta[2',3']cyclobuta[1',2':3,4]benzo[1,2-b]oxirene	Terpenoids	104188-24-1	1.23585	1.37484	/	√
(1S,4R,7S,8R,11R,13R)-4,7,11-Trimethyl-5-oxatetracyclo[5.4.2.01,8.04,13]tridecane	Terpenoids	18319-31-8	1.23462	1.36164	/	√
Salvial-4(14)-en-1-one	Terpenoids	73809-82-2	1.89276	1.32495	/	√
2,6,9,11-Dodecatetraenal, 2,6,10-trimethyl-	Terpenoids	4955-32-2	1.12486	1.29906	/	√
7-Acetyl-2-hydroxy-2-methyl-5-isopropylbicyclo[4.3.0]nonane	Terpenoids	96093-81-1	1.2417	1.29456	/	√
Bicyclo[3.1.1]hept-2-en-6-ol, 2,7,7-trimethyl-, acetate, [1S-(1α,5α,6β)]-	Ester	50764-55-1	0.704447	0.990793	/	-
Dihydrocarvyl acetate	Ester	20777-49-5	1.0745	0.98956	floral sweet minty	-
Propanoic acid, 2-methyl-, phenylmethyl ester	Ester	103-28-6	1.07263	0.975678	floral, oily fruity sweet	-
Butanethioic acid, 3-methyl-, S-(1-methylpropyl) ester	Ester	2432-91-9	1.02299	0.972108	spicy galbanum green herbal	-
Diisopropyl adipate	Ester	6938-94-9	1.02376	0.968805	estery fatty sour	-
Butanoic acid, 3-methyl-, 2-phenylethyl ester	Ester	140-26-1	1.03306	0.964165	floral fruity sweet	-
Butanoic acid, 2-methyl-, 2-phenylethyl ester	Ester	24817-51-4	1.00146	0.948964	floral green sweet tropical waxy rose	-
Citronellyl valerate	Ester	7540-53-6	0.153643	0.945486	herbal honey	-
(E)-2-Methylbut-2-en-1-yl methacrylate	Ester	88142-95-4	0.936651	0.92704	/	-
Acetic acid, 1-methyl-3-(2,6,6-trimethylcyclohex-1-enyl)propyl ester	Ester	86756-12-9	0.883158	0.920759	/	-
2,4-Decadienoic acid, ethyl ester, (E,Z)-	Ester	3025-30-7	0.907524	0.902179	green waxy sweet fruity tropical	-
Phenol, 2-methoxy-4-(2-propenyl)-, acetate	Ester	93-28-7	0.606529	0.868877	fresh sweet woody floral spicy	-
Methyl jasmonate	Ester	1211-29-6	0.602312	0.86873	floral fresh waxy	-
Ethyl 9-decenoate	Ester	67233-91-4	0.78482	0.840097	fruity fatty	-
Butanoic acid, 3-methyl-, 8-decene-4,6-diynyl ester, (Z)-	Ester	126693-81-0	0.216493	0.828085	/	-
Decanoic acid, ethyl ester	Ester	110-38-3	0.67872	0.803007	sweet waxy fruity	-
Propanoic acid, 2-methyl-, 3-phenylpropyl ester	Ester	103-58-2	0.0254583	0.749548	fruity,honey	-
(Z)-Cinnamyl benzoate	Ester	117204-78-1	0.573637	0.718823	/	-
2-Butenoic acid, hexyl ester	Ester	19089-92-0	0.533067	0.710358	fruity,sweet caramellic green oily radish	-
Butanoic acid, 5-hexenyl ester	Ester	108058-75-9	0.522777	0.709972	/	-
Hexadecanoic acid, ethyl ester	Ester	628-97-7	0.524189	0.691685	waxy fruity creamy balsamic greasy	-
Benzoic acid, 2-(dimethylamino)-, methyl ester	Ester	10072-05-6	0.000686509	0.681559	fruity,orange	-
E-2-Hexenyl benzoate	Ester	76841-70-8	0.315745	0.631795	/	-
Pentanoic acid, 3,7-dimethyl-2,6-octadienyl ester, (E)-	Ester	10402-47-8	0.403132	0.613824	floral fruity	-
Cyclopentaneacetic acid, 3-oxo-2-pentyl-, methyl ester	Ester	24851-98-7	0.294865	0.58369	floral oily green natural	-
Geranyl isovalerate	Ester	109-20-6	0.243136	0.534791	green fruity	-
Benzoic acid, hexyl ester	Ester	6789-88-4	0.101058	0.527874	fresh clean woody	-
Acetic acid, 2-phenylethyl ester	Ester	103-45-7	0.233581	0.509067	floral rose sweet honey fruity tropical	-
(S)-3,3,6-Trimethylhepta-1,5-dien-4-yl acetate	Ester	3465-88-1	0.0562294	0.239891	/	-
2-Butenoic acid, 3-hexenyl ester, (E,Z)-	Ester	65405-80-3	0.00527681	0.0980688	green vegetable	-
p-Menth-8-en-3-ol, acetate	Ester	89-49-6	0.0104897	0.0950836	minty leafy	-
Khusimyl methyl ether	Ether	300349-20-6	0.750943	0.833463	/	-
2,3-Dimethylanisole	Ether	2944-49-2	0.110391	0.336128	/	-
10,10-Dimethyl-2,6-dimethylenebicyclo[7.2.0]undecane	Terpenoids	357414-37-0	1.50488	1.28797	/	√
(-)-Aristolene	Terpenoids	6831-16-9	1.57142	1.28199	/	√
(1R,3aS,8aS)-7-Isopropyl-1,4-dimethyl-1,2,3,3a,6,8a-hexahydroazulene	Terpenoids	36577-33-0	1.5715	1.28137	/	√
(1S,4aR,7R)-1,4a-Dimethyl-7-(prop-1-en-2-yl)-1,2,3,4,4a,5,6,7-octahydronaphthalene	Terpenoids	52026-55-8	1.60951	1.2733	/	√
(3S,3aS,6R,8aS)-3,8,8-Trimethyl-7-methyleneoctahydro-1H-3a,6-methanoazulene	Terpenoids	31145-21-8	1.56111	1.27139	/	√
1,1,7,7a-Tetramethyl-1a,2,6,7,7a,7b-hexahydro-1H-cyclopropa[a]naphthalene	Terpenoids	154098-14-3	1.53295	1.25149	/	√
Di-epi-α-cedrene	Terpenoids	50894-66-1	1.70725	1.24874	/	√
cis-Calamenene	Terpenoids	72937-55-4	1.42623	1.24556	/	√
1H-3a,7-Methanoazulene, 2,3,4,7,8,8a-hexahydro-3,6,8,8-tetramethyl-, (3R,3aS,7S,8aR)-	Terpenoids	65354-33-8	1.57219	1.24382	/	√
(1S,5S)-2-Methyl-5-((R)-6-methylhept-5-en-2-yl)bicyclo[3.1.0]hex-2-ene	Terpenoids	159407-35-9	1.57215	1.24376	/	√
(1R,3aR,4aR,8aR)-1,4,4,6-Tetramethyl-1,2,3,3a,4,4a,7,8-octahydrocyclopenta[1,4]cyclobuta[1,2]benzene	Terpenoids	94482-89-0	1.59237	1.2368	/	√
Benzene, 1-methyl-4-(1,2,2-trimethylcyclopentyl)-, (R)-	Terpenoids	16982-00-6	0.815671	1.21372	/	√
2,7-Octadiene-1,6-diol, 2,6-dimethyl-, (E)-	Terpenoids	75991-61-6	1.64995	1.20802	/	√
(1R,4R,4aS,8aR)-4,7-Dimethyl-1-(prop-1-en-2-yl)-1,2,3,4,4a,5,6,8a-octahydronaphthalene	Terpenoids	92692-39-2	1.60387	1.19522	/	√
2H-Pyran-3-ol, tetrahydro-2,2,6-trimethyl-6-(4-methyl-3-cyclohexen-1-yl)-, [3S-[3α,6α(R*)]]-	Terpenoids	22567-36-8	1.41287	1.18173	/	√
dl-Camphoroquinone	Terpenoids	10373-78-1	1.21466	1.17208	/	√
4a,8-Dimethyl-2-(prop-1-en-2-yl)-1,2,3,4,4a,5,6,7-octahydronaphthalene	Terpenoids	103827-22-1	0.538147	1.15315	/	√
1,6,10-Dodecatriene, 7,11-dimethyl-3-methylene-	Terpenoids	77129-48-7	1.48464	1.14786	/	√
Naphthalene, decahydro-1,6-bis(methylene)-4-(1-methylethyl)-, (4α,4aα,8aα)-	Terpenoids	30021-46-6	1.41642	1.13109	/	√
trans-Calamenene	Terpenoids	73209-42-4	0.91699	1.11573	/	√
Di-epi-α-cedrene-(I)	Terpenoids	21996-77-0	0.701569	1.10272	/	√
5H-5-Methyl-6,7-dihydrocyclopentapyrazine	Heterocyclic compound	23747-48-0	0.0984392	0.934367	/	-
Isopsoralen	Heterocyclic compound	523-50-2	0.858984	0.903445	/	-
3-Acetyl-2,5-dimethylbenzo(b)thiophene	Heterocyclic compound	6179-04-0	0.0905119	0.8804	/	-
Ficusin	Heterocyclic compound	66-97-7	0.281155	0.851582	/	-
1,3-Benzodioxole, 4,5-dimethoxy-6-(2-propenyl)-	Heterocyclic compound	484-31-1	0.163206	0.79851	woody spicy	-
4,4-Dimethyl-1,2,3,4-tetrahydro-γ-carboline	Heterocyclic compound	22315-87-3	0.710857	0.78842	/	-
4-Pyridinecarboxamide	Heterocyclic compound	1453-82-3	0.0867073	0.738945	/	-
6-Quinolinamine, 2-methyl-	Heterocyclic compound	65079-19-8	0.505148	0.707687	/	-
Pentobarbital	Heterocyclic compound	76-74-4	0.538882	0.7012	/	-
Acridine	Heterocyclic compound	260-94-6	0.182762	0.698074	/	-
Methoxsalen	Heterocyclic compound	298-81-7	0.521791	0.691242	/	-
3-Pentyl-4,5,6,7-tetrahydro-1H-indazole	Heterocyclic compound	22122-91-4	0.00260119	0.681414	/	-
Scopoletin	Heterocyclic compound	92-61-5	0.413468	0.598498	/	-
Hygrine	Heterocyclic compound	496-49-1	0.273456	0.597403	/	-
3-Butylisobenzofuran-1(3H)-one	Heterocyclic compound	6066-49-5	0.292428	0.579183	herbal phenolic celery	-
2-Amino-6-t-butyl-3-cyano-4,5,6,7-tetrahydrothianaphthene	Heterocyclic compound	42159-76-2	0.366694	0.558413	/	-
Thiophene, 2-pentyl-	Heterocyclic compound	4861-58-9	0.0776681	0.274104	fatty chicken coup cranberry hazelnut roasted corn barley fermented meaty bloody	-
2-((3,3-Dimethyloxiran-2-yl)methyl)-3-methylfuran	Heterocyclic compound	92356-06-4	0.00329377	0.244146	green earthy citrus	-
trans-O-Dithiane-4,5-diol	Heterocyclic compound	14193-38-5	0.0435988	0.196108	/	-
Santalol, E-cis,epi-β-	Terpenoids	14490-17-6	0.898674	1.08962	/	√
(1S,4S,4aS)-1-Isopropyl-4,7-dimethyl-1,2,3,4,4a,5-hexahydronaphthalene	Terpenoids	267665-20-3	1.30476	1.08515	/	√
(E)-1-Methyl-4-(6-methylhept-5-en-2-ylidene)cyclohex-1-ene	Terpenoids	53585-13-0	1.14416	1.0821	/	√
Cyclohexanone, 5-methyl-2-(1-methylethenyl)-	Terpenoids	529-00-0	1.05639	1.04975	/	√
Bicyclo[3.1.1]hept-2-ene, 2,6-dimethyl-6-(4-methyl-3-pentenyl)-	Terpenoids	17699-05-7	1.09083	1.0382	/	√
Bicyclo[3.1.1]heptan-3-one, 2,6,6-trimethyl-, (1α,2β,5α)-	Terpenoids	15358-88-0	0.997014	1.03631	/	√
Tetradecane, 4-methyl-	Hydrocarbons	25117-24-2	0.984271	0.953676	/	-
Cyclobuta[1,2:3,4]dicyclooctene, 1,2,5,6,6a,6b,7,8,11,12,12a,12b-dodecahydro-, (6aα,6bβ,12aα,12bβ)-	Hydrocarbons	61277-44-9	0.817287	0.914631	/	-
1-Pentadecene	Hydrocarbons	13360-61-7	0.790666	0.845963	/	-
1,E-11,Z-13-Hexadecatriene	Hydrocarbons	80634-97-5	0.673429	0.823114	/	-
(Z)-2,2-Dimethyl-3-(3-methylpenta-2,4-dien-1-yl)oxirane	Hydrocarbons	33281-83-3	0.221448	0.798083	/	-
Undecane, 4,7-dimethyl-	Hydrocarbons	17301-32-5	0.550182	0.725655	/	-
Undecane, 5,7-dimethyl-	Hydrocarbons	17312-83-3	0.522688	0.709988	/	-
1-Dodecene	Hydrocarbons	112-41-4	0.524051	0.696736	/	-
Undecane, 3,8-dimethyl-	Hydrocarbons	17301-30-3	0.489119	0.6734	/	-
1,8,11,14-Heptadecatetraene, (Z,Z,Z)-	Hydrocarbons	10482-53-8	0.324889	0.659287	/	-
Pentacosane	Hydrocarbons	629-99-2	0.391617	0.586114	/	-
Eicosane, 7-hexyl-	Hydrocarbons	55333-99-8	0.369523	0.565433	/	-
Pentadecane, 4-methyl-	Hydrocarbons	2801-87-8	0.277422	0.496846	/	-
Undecane, 2,4-dimethyl-	Hydrocarbons	17312-80-0	0.135882	0.465364	/	-
Undecane, 3,5-dimethyl-	Hydrocarbons	17312-81-1	0.0851048	0.318885	/	-
Dodecane, 5-methyl-	Hydrocarbons	17453-93-9	0.00345458	0.120446	/	-
7-Octylidenebicyclo[4.1.0]heptane	Terpenoids	82253-11-0	1.03399	1.03624	/	√
Bergamotol, Z-α-trans-	Terpenoids	88034-74-6	1.16071	1.03	/	√
Ylangene	Terpenoids	14912-44-8	0.587677	1.02817	/	√
Eremophilene	Terpenoids	10219-75-7	1.16371	1.02771	/	√
Dauca-4(11),8-diene	Terpenoids	395070-76-5	1.05559	1.01681	/	√
[1α,4aα,8aα]-1,2,4a,5,6,8a-hexahydro-4-7-dimethyl-1-[1-methylethyl]naphthalene	Terpenoids	31983-22-9	1.12345	1.01611	/	√
Kessane	Terpenoids	3321-66-2	0.935308	1.01224	/	√
2-Octenal, 2-butyl-	Alcohol	13019-16-4	1.16561	1.02541	aldehydic green fruity metallic fatty sweaty	√
Indole, 3-methyl-	Heterocyclic compound	83-34-1	1.37917	1.27329	animal fecal naphthyl civet	√
p-Tolyl isobutyrate	Ester	103-93-5	1.64996	1.21893	animal floral green fruity	√
Benzyl tiglate	Ester	37526-88-8	1.18824	1.03593	balsamic earthy mushroom vegetable plastic c nutty	√
1-Pentanone, 1-phenyl-	Ketone	1009-14-9	0.817771	1.02426	balsamic valerian root	√
Butanoic acid, anhydride	Others	106-31-0	1.35141	1.22773	butter	√
Isobornyl formate	Ester	1200-67-5	0.642903	1.23794	camphoreous musty medicinal woody	√
1H-Cyclopenta[1,3]cyclopropa[1,2]benzene, octahydro-7-methyl-3-methylene-4-(1-methylethyl)-, [3aS-(3aα,3bβ,4β,7α,7aS*)]-	Terpenoids	13744-15-5	1.49185	1.22037	citrus fruity radish	√
cis-β-Farnesene	Terpenoids	28973-97-9	1.50436	1.29608	citrus green	√
2,6-Dodecadien-1-al	Aldehyde	21662-13-5	1.4669	1.29524	citrus mandarin melon,fatty	√
Benzeneacetic acid, 4-(1,1-dimethylethyl)-, methyl ester	Ester	3549-23-3	1.13608	1.1899	dairy leafy green waxy	√
BenzAldehyde, 3,4-dihydroxy-	Aldehyde	139-85-5	1.80184	1.26764	dry medicinal bitter	√
2-Butanone, 4-(2,6,6-trimethyl-1-cyclohexen-1-yl)-	Ketone	17283-81-7	1.11168	1.03332	earthy woody orris dry	√
5,9-Undecadien-2-one, 6,10-dimethyl-, (Z)-	Ketone	3879-26-3	0.732703	1.0421	fatty metallic	√
2-Tridecanone	Ketone	593-08-8	1.31043	1.13577	fatty waxy dairy milky coconut nutty herbal earthy	√
d-Nerolidol	Terpenoids	142-50-7	1.36571	1.32526	floral	√
Geranyl acetate	Ester	105-87-3	1.61905	1.19394	floral , green waxy	√
Propanoic acid, 2-methyl-, 2-phenylethyl ester	Ester	103-48-0	1.46198	1.2569	floral fruity tea	√
2-Furancarboxylic acid, hexyl ester	Ester	39251-86-0	1.10507	1.04646	floral waxy green sweet	√
3,5,9-Undecatrien-2-one, 6,10-dimethyl-, (E,Z)-	Ketone	13927-47-4	1.04164	0.997256	/	-
Megastigmatrienone	Ketone	38818-55-2	0.869296	0.987404	/	-
Ketone, methyl 2,4,5-trimethylpyrrol-3-yl	Ketone	19005-95-9	1.05585	0.98681	/	-
2-Butanone, 4-(4-hydroxy-3-methoxyphenyl)-	Ketone	122-48-5	0.774052	0.986454	sweet spicy phenolic woody	-
2H-Indol-2-one, 1,3-dihydro-	Ketone	59-48-3	1.01267	0.956669	/	-
Cyclohexanone, 2,2,6-trimethyl-	Ketone	2408-37-9	0.85216	0.904015	pungent honey cistus	-
(Z)-2,6-Dimethylocta-2,5,7-trien-4-one	Ketone	33746-71-3	0.914137	0.901932	/	-
4,6-Octadiyn-3-one, 2-methyl-	Ketone	29743-33-7	0.842821	0.891494	/	-
3-Isopropylidene-5-methyl-hex-4-en-2-one	Ketone	64149-32-2	0.530517	0.886922	/	-
2-Undecanone, 6,10-dimethyl-	Ketone	1604-34-8	0.86297	0.87935	dry musty	-
1,3-Pentanedione, 4,4-dimethyl-1-phenyl-	Ketone	13988-67-5	0.676028	0.835127	/	-
2H-Pyran-2-one, tetrahydro-6-methyl-	Ketone	823-22-3	0.420188	0.830724	creamy fruity coconut	-
Bicyclo[3.1.1]heptan-3-one, 2-hydroxy-2,6,6-trimethyl-	Ketone	10136-65-9	0.610186	0.78348	/	-
2-Nonanone, 3-(hydroxymethyl)-	Ketone	67801-33-6	0.42564	0.761694	herbal fresh sweet green weedy earthy	-
2-Cyclohexen-1-one, 4-(3-hydroxy-1-butenyl)-3,5,5-trimethyl-	Ketone	34318-21-3	0.46489	0.75906	spicy	-
2,5-Pyrrolidinedione, 1-ethyl-	Ketone	2314-78-5	0.551269	0.715705	/	-
1-((1S,3aR,4S,7R,7aR)-3a,7a-Dimethyloctahydro-1H-4,7-methanoinden-1-yl)ethanone	Ketone	66748-84-3	0.417457	0.699848	/	-
4-Hexen-3-one, 5-methyl-	Ketone	13905-10-7	0.530015	0.690347	/	-
3-[4-Hydroxyisopent-2(Z)-enyl]-4-hydroxyacetophenone	Ketone	24672-83-1	0.548343	0.690258	/	-
2H-Furo[2,3-h]-1-benzopyran-2-one, 5-methoxy-	Ketone	482-48-4	0.518185	0.687969	/	-
3-Nonen-5-one	Ketone	82456-34-6	0.489176	0.681767	/	-
2-Butanone, 4-(2,6,6-trimethyl-2-cyclohexen-1-yl)-	Ketone	31499-72-6	0.112041	0.644878	woody,floral,fruity,powdery	-
o-Hydroxydibenzoylmethane	Ketone	1469-94-9	0.0526815	0.557044	/	-
2-Cyclohexen-1-one, 3-methyl-	Ketone	1193-18-6	0.14604	0.445826	nutty caramellic phenolic cherry	-
4-Undecanone	Ketone	14476-37-0	0.0851167	0.318912	fruity	-
2(5H)-Furanone, 5-ethyl-3-hydroxy-4-methyl-	Ketone	698-10-2	0.00506704	0.21692	caramellic maple sweet fruity fenugreek sugar nutty chicory praline butterscotch	-
2-Cyclopenten-1-one, 2-hydroxy-3,4-dimethyl-	Ketone	21835-00-7	0.0127135	0.159033	caramellic	-
7-Oxabicyclo[4.1.0]heptan-2-one, 6-methyl-3-(1-methylethyl)-	Ketone	5286-38-4	0.0111917	0.126046	/	-
4-Isopropyl-1,3-cyclohexanedione	Ketone	62831-62-3	0.00759287	0.112242	/	-
1,3-Cyclohexadiene-1-carboxylic acid, 2,6,6-trimethyl-, ethyl ester	Ester	35044-59-8	1.11505	1.0364	floral,fresh, herbal, woody	√
Benzene, (1-nitropropyl)-	Nitrogen compounds	5279-14-1	0.0692792	0.706592	/	-
Propanenitrile, 3-(butylphenylamino)-	Nitrogen compounds	61852-40-2	0.162892	0.43304	/	-
β-Phenylethyl butyrate	Ester	103-52-6	1.57207	1.27523	floral,musty sweet	√
Acetophenone, 4'-hydroxy-	Ketone	99-93-4	1.53663	1.16119	floral,sweet	√
Pargyline	Amine	555-57-7	1.54636	1.1665	floral,sweet, fruity	√
1-iodo-Decane	Others	2050-77-3	0.209602	0.581656	/	-
Benzene, (2-nitroethyl)-	Aromatics	6125-24-2	0.988491	1.01554	flower spice	√
BenzAldehyde, 4-ethyl-	Aldehyde	4748-78-1	1.30101	1.10415	fruity	√
BenzAldehyde, 4-methyl-	Aldehyde	104-87-0	1.1503	1.09498	fruity ,phenolic	√
8-Nonen-2-one	Ketone	5009-32-5	1.21353	1.03959	fruity baked	√
cis-Chrysanthenol	Phenol	55722-60-6	0.102469	0.740446	/	-
5-Amino-2-methoxyphenol	Phenol	1687-53-2	0.237231	0.45202	/	-
Phenol, 4-propyl-	Phenol	645-56-7	0.00604423	0.161248	medicinal phenolic	-
3-Octen-2-one, 7-methyl-	Ketone	33046-81-0	1.20559	1.065	fruity fatty oily nutty meaty	√
Ethanethioic acid, S-(2-furanylmethyl) ester	Sulfur compounds	13678-68-7	0.0523832	0.226695	sulfurous burnt roasted nutty coffee	-
Acetic acid, hexyl ester	Ester	142-92-7	1.55032	1.19624	fruity green sweet	√
Hexanoic acid, 3-methyl-2-butenyl ester	Ester	76649-22-4	1.621	1.19913	fruity green cheesy	√
Furan, 2-pentyl-	Heterocyclic compound	3777-69-3	1.22838	1.03241	fruity green earthy beany metallic	√
Pentanoic acid, 1-ethenyl-1,5-dimethyl-4-hexenyl ester	Ester	10471-96-2	1.01193	1.34908	fruity lavender apricot citrus	√
Butanoic acid, butyl ester	Ester	109-21-7	1.64905	1.23357	fruity,green	√
2-Buten-1-one, 1-(2,6,6-trimethyl-1,3-cyclohexadien-1-yl)-, (E)-	Terpenoids	23726-93-4	1.76559	1.24725	fruity,rose tobacco sweet	√
(E,E)-2,4-Undecadienal	Aldehyde	30361-29-6	1.0986	1.05138	green	√
Pyrazine, 2-methoxy-3-(1-methylpropyl)-	Heterocyclic compound	24168-70-5	1.20596	1.11289	green	√
p-Mentha-1,8-dien-7-ol	Terpenoids	536-59-4	1.1289	1.01452	green spicy woody floral waxy	√
2,4-Heptadien-1-ol, (E,E)-	Alcohol	33467-79-7	0.858571	1.1873	green fruity nutty cheesy	√
2-Heptenoic Acid	Acid	18999-28-5	1.1509	1.02476	green grassy fruity	√
2-Cyclohexen-1-ol, 2-methyl-5-(1-methylethenyl)-, acetate	Ester	97-42-7	1.22314	1.18985	green minty herbal spicy	√
2-Phenoxyethyl isobutyrate	Ester	103-60-6	1.3739	1.13542	green sweet fruity honey floral waxy	√
3-Cyclohexene-1-methanol, α,α,4-trimethyl-, propanoate	Terpenoids	80-27-3	1.11757	1.03686	herbal green woody	√
2-Cyclohexen-1-one, 3-methyl-6-(1-methylethyl)-	Heterocyclic compound	89-81-6	1.02952	1.24893	herbal minty camphoreous medicinal	√
Naphthalene, 1,2,3,4-tetrahydro-1,6-dimethyl-4-(1-methylethyl)-, (1S-cis)-	Terpenoids	483-77-2	0.889382	1.02923	herbal spice	√
(-)-β-Bourbonene	Terpenoids	5208-59-3	1.64366	1.19883	herbal woody floral	√
Acetic Acid, phenoxy-	Acid	122-59-8	1.52386	1.26212	honey,sour sweet	√
6-Nonen-1-ol, acetate, (Z)-	Ester	76238-22-7	1.23294	1.12174	melon green tropical pear metallic	√
Carveol	Terpenoids	99-48-9	1.12641	1.31121	minty green herbal spicy	√
Benzoic acid, ethyl ester	Ester	93-89-0	0.825755	1.138	minty,fruity dry musty sweet	√
1-Propanone, 1-(4-methoxyphenyl)-	Ketone	121-97-1	1.34982	1.08418	musty anisic	√
BenzAldehyde, 2,4-dimethyl-	Aldehyde	15764-16-6	1.21135	1.59071	naphthyl cherry almond spicy vanilla	√
n-Capric acid isobutyl ester	Ester	30673-38-2	1.32307	1.37916	oily sweet brandy apricot	√
Levomenthol	Terpenoids	2216-51-5	1.17222	1.12836	peppermint cooling mentholic minty	√
Propofol	Phenol	2078-54-8	1.06232	1.02351	phenolic	√
Benzoic Acid, 4-hydroxy-	Aromatics	99-96-7	0.455775	1.10662	phenolic nutty	√
Pyrazine, 2-methyl-5-(1-methylethyl)-	Heterocyclic compound	13925-05-8	1.43009	1.13239	roasted green nutty earthy	√
trans-3-Methyl-4-octanolide	Ester	39638-67-0	1.5883	1.197	spicy coconut clove celery incense	√
Cubenol	Phenol	21284-22-0	1.30428	1.27058	spicy herbal green	√
TetraSulfur compounds, di-2-propenyl	Sulfur compounds	2444-49-7	1.1046	1.01275	sulfurous garlic onion	√
Estragole	Aromatics	140-67-0	0.440488	1.02482	sweet anise spicy green herbal	√
Hexanoic acid, 2-phenylethyl ester	Ester	6290-37-5	1.05193	1.06018	sweet floral waxy woody green	√
BenzeneacetAldehyde, α-(2-methylpropylidene)-	Aldehyde	26643-91-4	1.36681	1.23142	sweet nutty rose powdery	√
Isoquinoline	Heterocyclic compound	119-65-3	2.21299	1.49832	sweet balsamic herbal	√
2-Propenoic acid, 3-phenyl-, methyl ester, (E)-	Ester	1754-62-7	0.994548	1.05232	sweet balsamic strawberry cherry	√
Acetic Acid, cinnamyl ester	Acid	103-54-8	1.53905	1.27466	sweet floral spicy	√
Benzenemethanol, α,α,4-trimethyl-	Terpenoids	1197-01-9	1.1345	1.00016	sweet fruity cherry floral camphoreous	√
Benzene, 1,1'-[oxybis(methylene)]bis-	Aromatics	103-50-4	0.705009	1.06089	sweet fruity earthy,mushroom	√
Citronellyl isobutyrate	Ester	97-89-2	1.61975	1.27219	sweet fruity floral	√
Benzoic acid, 1-methylethyl ester	Aromatics	939-48-0	1.22592	1.22177	sweet fruity floral balsamic	√
Citronellyl butyrate	Ester	141-16-2	1.46417	1.21871	sweet fruity floral,green waxy	√
Hexanoic acid, pentyl ester	Ester	540-07-8	1.46815	1.20691	sweet green fruity fatty	√
Phenylacetic acid propyl ester	Ester	4606-15-9	1.61964	1.2549	sweet honey floral	√
3-Phenylpropanol	Alcohol	122-97-4	0.636691	1.00566	sweet spicy cinnamyl floral	√
Phenol, 2-methoxy-4-(1-propenyl)-, acetate	Ester	93-29-8	1.68021	1.2333	sweet spicy powdery floral balsamic	√
Hydrocoumarin	Heterocyclic compound	119-84-6	1.59522	1.24778	sweet tonka herbal	√
(-)-Bornyl acetate	Terpenoids	5655-61-8	1.06766	1.16216	sweet,woody,fresh ,herbal	√
2-Decenal, (Z)-	Aldehyde	2497-25-8	1.37686	1.24859	tallow fatty	√
Coumarin	Heterocyclic compound	91-64-5	1.58273	1.28007	tonka,sweet	√
Hexadecanoic acid, methyl ester	Ester	112-39-0	0.903711	1.63765	waxy fatty orris	√
2-Nonen-1-ol, (E)-	Alcohol	31502-14-4	1.17616	1.02534	waxy green violet melon	√
β-Santalol	Alcohol	77-42-9	1.45432	1.43652	woody	√
Aromandendrene	Terpenoids	489-39-4	1.50395	1.29624	woody	√
Alloaromadendrene	Terpenoids	25246-27-9	1.49638	1.15113	woody	√
(4aR-trans)-decahydro-4a-methyl-1-methylene-7-(1-methylethylidene)-Naphthalene	Terpenoids	515-17-3	0.609831	1.06115	woody	√
α-Muurolene	Terpenoids	10208-80-7	1.146	1.02315	woody	√
(-)-Myrtenol	Terpenoids	19894-97-4	1.30218	1.27306	woody medicinal	√
(E)-β-Famesene	Terpenoids	18794-84-8	1.48984	1.1498	woody citrus herbal sweet	√
Cedrol	Terpenoids	77-53-2	1.91901	1.31232	woody,sweet	√
1,2,4-Methenoazulene, decahydro-1,5,5,8a-tetramethyl-, [1S-(1α,2α,3aβ,4α,8aβ,9R*)]-	Terpenoids	1137-12-8	0.99026	0.994483	/	-
Muurola-4,10(14)-dien-1β-ol	Terpenoids	257293-90-6	0.490348	0.99122	/	-
1,3-Cyclohexadiene, 5-(1,5-dimethyl-4-hexenyl)-2-methyl-, [S-(R*,S*)]-	Terpenoids	495-60-3	1.06542	0.979539	spicy fresh sharp	-
(3R,3aR,7S,8aS)-3,6,8,8-Tetramethyl-4,7,8,8a-tetrahydro-1H-3a,7-methanoazulen-2(3H)-one	Terpenoids	288249-25-2	0.922118	0.978051	/	-
3,7-Cyclodecadien-1-one, 3,7-dimethyl-10-(1-methylethylidene)-, (E,E)-	Terpenoids	6902-91-6	0.782695	0.971413	/	-
Levomenol	Terpenoids	23089-26-1	0.721561	0.96848	floral, fruity nutty coconut	-
Bicyclo[7.2.0]undec-4-ene, 4,11,11-trimethyl-8-methylene-,[1R-(1R*,4Z,9S*)]-	Terpenoids	118-65-0	0.16606	0.955375	woody spicy	-
(1S,2E,6E,10R)-3,7,11,11-Tetramethylbicyclo[8.1.0]undeca-2,6-diene	Terpenoids	24703-35-3	0.983895	0.952847	green woody weedy	-
3-Buten-2-one, 4-(2,2,6-trimethyl-7-oxabicyclo[4.1.0]hept-1-yl)-	Terpenoids	23267-57-4	0.984089	0.941945	fruity sweet woody orris powdery	-
Azulene, 1,2,3,3a,4,5,6,7-octahydro-1,4-dimethyl-7-(1-methylethenyl)-, [1R-(1α,3aβ,4α,7β)]-	Terpenoids	22567-17-5	0.96079	0.930912	musty	-
(5R,10R)-10-Methyl-6-methylene-2-(propan-2-ylidene)spiro[4.5]dec-7-ene	Terpenoids	28908-27-2	0.965701	0.928593	/	-
Cyclohexene, 4-ethenyl-4-methyl-3-(1-methylethenyl)-1-(1-methylethyl)-, (3R-trans)-	Terpenoids	20307-84-0	1.0015	0.925434	sweet herbal woody	-
trans-α-Bergamotene	Terpenoids	13474-59-4	0.0547071	0.918501	woody warm tea	-
Naphthalene, 1,2,3,4,4a,7-hexahydro-1,6-dimethyl-4-(1-methylethyl)-	Terpenoids	16728-99-7	0.905477	0.908099	/	-
(2R,3R,6S)-6-Isopropyl-3-methyl-2-(prop-1-en-2-yl)-3-vinylcyclohexanone	Terpenoids	39020-72-9	0.877823	0.891736	/	-
(1S,5S,6R)-6-Methyl-2-methylene-6-(4-methylpent-3-en-1-yl)bicyclo[3.1.1]heptane	Terpenoids	15438-94-5	0.855716	0.883221	/	-
L-Fenchone	Terpenoids	7787-20-4	0.843729	0.879818	camphoreous herbal earthy woody	-
1-Cyclohexene-1-carboxylic acid, 4-(1-methylethenyl)-	Terpenoids	7694-45-3	0.874728	0.876016	/	-
α-Calacorene	Terpenoids	21391-99-1	0.489556	0.850112	woody	-
1,3,6,10-Dodecatetraene, 3,7,11-trimethyl-, (Z,E)-	Terpenoids	26560-14-5	0.790704	0.846052	/	-
trans-Rose oxide	Terpenoids	876-18-6	0.628869	0.826243	/	-
β-Guaiene	Terpenoids	88-84-6	0.702606	0.80285	sweet woody spicy powdery balsamic	-
(1R,4aR,4bR,10aR)-7-Isopropyl-1,4a-dimethyl-1,2,3,4,4a,4b,5,6,10,10a-decahydrophenanthrene-1-carbaldehyde	Terpenoids	6704-50-3	0.160173	0.796057	/	-
Bicyclosesquiphellandrene	Terpenoids	54324-03-7	0.678636	0.787918	/	-
Cyclohexanol, 3-ethenyl-3-methyl-2-(1-methylethenyl)-6-(1-methylethyl)-, [1R-(1α,2α,3β,6α)]-	Terpenoids	35727-45-8	0.0907548	0.785517	/	-
7-Octen-4-ol, 2-methyl-6-methylene-, (S)-	Terpenoids	35628-05-8	0.508058	0.782826	/	-
endo-Borneol	Terpenoids	507-70-0	0.0915477	0.755642	pine woody camphoreous balsamic	-
Ethanone, 1-(1,3-dimethyl-3-cyclohexen-1-yl)-	Terpenoids	51733-68-7	0.147314	0.738626	/	-
β-Acorenol	Terpenoids	28400-11-5	0.397824	0.731709	/	-
Benzofuran, 4,5,6,7-tetrahydro-3,6-dimethyl-	Terpenoids	494-90-6	0.0909161	0.728718	pungent musty nutty earthy	-
Copaene	Terpenoids	3856-25-5	0.585003	0.72577	woody spicy honey	-
Noruron	Terpenoids	18530-56-8	0.579226	0.721446	/	-
4-(1-methylethyl)-Benzaldehyde	Terpenoids	122-03-2	0.501769	0.71912	spicy cumin green herbal	-
Naphthalene, 1,2,4a,5,6,8a-hexahydro-4,7-dimethyl-1-(1-methylethyl)-, [1S-(1α,4aβ,8aα)]-	Terpenoids	24406-05-1	0.399936	0.717006	woody dry	-
Cyclobutaneethanol, 1-methyl-2-(1-methylethenyl)-, cis-	Terpenoids	30820-22-5	0.455337	0.706105	/	-
Chalcone	Terpenoids	94-41-7	0.553362	0.704726	/	-
Pinocarvone	Terpenoids	30460-92-5	0.10518	0.696482	minty	-
Isopinocarveol	Terpenoids	6712-79-4	0.526121	0.695359	woody warm balsamic	-
2,6,10-Dodecatrienal, 3,7,11-trimethyl-	Terpenoids	19317-11-4	0.430916	0.665672	floral minty	-
Bicyclo[5.2.0]nonane, 2-methylene-4,8,8-trimethyl-4-vinyl-	Terpenoids	242794-76-9	0.0376792	0.643116	/	-
(3S,3aR,6R,8aS)-3,7,7-Trimethyl-8-methylenehexahydro-1H-3a,6-methanoazulen-2(3H)-one	Terpenoids	28624-27-3	0.359062	0.630376	/	-
Daucol	Terpenoids	887-08-1	0.382983	0.614803	/	-
Acetic acid, (4,6,8,9-tetramethyl-3-oxabicyclo[3.3.1]non-6-en-1-yl)methyl ester	Terpenoids	309722-81-4	0.285326	0.573922	/	-
Citronellyl tiglate	Terpenoids	24717-85-9	0.285486	0.566646	fruity floral leafy tea	-
(1R,4aR,4bS,7S,10aR)-1,4a,7-Trimethyl-7-vinyl-1,2,3,4,4a,4b,5,6,7,8,10,10a-dodecahydrophenanthrene-1-carbaldehyde	Terpenoids	1686-63-1	0.181759	0.522053	/	-
1,5-Cyclodecadiene, 1,5-dimethyl-8-(1-methylethylidene)-, (E,E)-	Terpenoids	15423-57-1	0.159603	0.467898	woody earthy spicy	-
4-Hexen-1-ol, 5-methyl-2-(1-methylethenyl)-, (R)-	Terpenoids	498-16-8	0.184881	0.444143	herbal	-
Bicyclo[2.2.1]heptan-2-ol, 1,7,7-trimethyl-, (1S-endo)-	Terpenoids	464-45-9	0.00977738	0.380882	balsamic, pine woody camphoreous peppery	-
Cyclohexene, 3-(1,5-dimethyl-4-hexenyl)-6-methylene-, [S-(R*,S*)]-	Terpenoids	20307-83-9	0.101694	0.353581	herbal fruity woody	-
Dehydroxy-isocalamendiol	Terpenoids	1005276-30-1	0.112456	0.348737	/	-
Geraniol	Terpenoids	106-24-1	0.0110212	0.114591	sweet floral fruity rose waxy citrus	-
(-)-Carvone	Terpenoids	6485-40-1	0.00667399	0.0909123	minty sweet spearmint herbal	-
Carvenone	Terpenoids	499-74-1	0.00173519	0.0413181	spearmint,minty	-
The odor quality of compounds were taken from http://www.thegoodscentscompany.com/
“/”Indicates that no aroma related information is found
“-” indicates that the substance is not a characteristic aroma component

## Sheet: Group Ⅲ
Compounds	Class	CAS	M2.Score Contrib(Group - Average), Weight=p1p2	VIP	Odor quality	Characteristic volatile components
Benzeneacetic Acid, 4-hydroxy-	Acid	156-38-7	0.433763	1.39268	/	-
2-Propenoic Acid, 3-(2-hydroxyphenyl)-	Acid	583-17-5	0.0736907	1.18819	/	-
2-Propenoic Acid, 3-(3-hydroxyphenyl)-	Acid	588-30-7	0.0982154	1.12313	/	-
Cyclohexanepropanoic Acid, 2-propenyl ester	Acid	2705-87-5	0.0182117	1.04589	fruity,sweet waxy	-
2-Propenoic Acid, 3-phenyl-	Acid	621-82-9	0.302847	0.846926	balsamic sweet storax cinnamyl	-
Acetic Acid, phenoxy-	Acid	122-59-8	0.0539914	1.26212	honey,sour sweet	-
Acetic Acid, cinnamyl ester	Acid	103-54-8	0.0633482	1.27466	sweet floral spicy	-
Benzenemethanol, α-methyl-α-(1-methyl-2-propenyl)-	Alcohol	61967-11-1	1.58499	1.55602	/	√
Patulin	Alcohol	149-29-1	0.348216	1.36205	/	-
1,2-Benzenedimethanol	Alcohol	612-14-6	0.0708457	1.25467	/	-
Benzenemethanol, α-2-propenyl-	Alcohol	936-58-3	0.0692073	1.2476	/	-
3,4-Dimethylcyclohexanol	Alcohol	5715-23-1	0.0866421	1.22453	/	-
Benzenemethanol, 3-hydroxy-	Alcohol	620-24-6	0.0713429	1.01476	/	-
3-phenoxy-Benzenemethanol	Alcohol	13826-35-2	0.533644	0.939494	/	-
Cyclohexanol, 2,6-dimethyl-	Alcohol	5337-72-4	0.0800484	0.333616	/	-
(E)-2,6-Dimethylocta-5,7-dien-2-ol	Alcohol	7643-60-9	0.00723564	0.325432	/	-
1H-3a,7-Methanoazulen-5-ol, octahydro-3,8,8-trimethyl-6-methylene-	Alcohol	28231-03-0	0.421568	0.911046	cedarwood woody sweet	-
1-Nonanol	Alcohol	143-08-8	0.00664874	0.386285	floral fresh clean fatty rose orange dusty	-
1-Tetradecanol	Alcohol	112-72-1	0.0998606	0.722364	fruity waxy orris coconut	-
trans,cis-2,6-Nonadien-1-ol	Alcohol	28069-72-9	0.0308622	0.672745	green cucumber oily violet leaf	-
2,4-Heptadien-1-ol, (E,E)-	Alcohol	33467-79-7	0.339754	1.1873	green fruity nutty cheesy	-
3-Phenylpropanol	Alcohol	122-97-4	0.216466	1.00566	sweet spicy cinnamyl floral	-
2,5-FurandicarboxAldehyde	Aldehyde	823-82-5	0.0107607	1.00845	/	-
AcetAldehyde, tetramer	Aldehyde	108-62-3	0.252544	0.920572	/	-
3-(4-Hydroxyphenyl)propanal	Aldehyde	20238-83-9	0.0456033	0.897258	/	-
3-p-Menthen-7-al	Aldehyde	27841-22-1	0.0250099	0.830467	/	-
4-Hydroxy-2-methylbenzAldehyde	Aldehyde	41438-18-0	0.0365139	0.458009	/	-
2,6-Dodecadien-1-al	Aldehyde	21662-13-5	0.122945	1.29524	citrus mandarin melon,fatty	-
3-Cyclohexene-1-carboxAldehyde, 4-(4-hydroxy-4-methylpentyl)-	Aldehyde	31906-04-4	0.107511	0.848711	floral woody	-
2-Butenal, 2-methyl-4-(2,6,6-trimethyl-1-cyclohexen-1-yl)-	Aldehyde	3155-71-3	0.246716	0.734564	floral,sweet, nutty , woody	-
BenzAldehyde, 4-methyl-	Aldehyde	104-87-0	0.0353251	1.09498	fruity ,phenolic	-
(E,E)-2,4-Undecadienal	Aldehyde	30361-29-6	0.0234476	1.05138	green	-
1-Cyclohexene-1-carboxAldehyde, 4-(1-methylethenyl)-, (S)-	Aldehyde	18031-40-8	0.191863	0.617959	herbal fresh green oily grassy fatty minty cherry	-
5-Heptenal, 2,6-dimethyl-	Aldehyde	106-72-9	0.27124	0.646943	melon fresh ozone sweet clean green	-
BenzeneacetAldehyde, α-(2-methylpropylidene)-	Aldehyde	26643-91-4	0.0872652	1.23142	sweet nutty rose powdery	-
BenzAldehyde, 4-methoxy-	Aldehyde	123-11-5	0.0328245	0.302413	sweet powdery mimosa floral hawthorn balsamic	-
2-Decenal, (Z)-	Aldehyde	2497-25-8	0.111768	1.24859	tallow fatty	-
GrAmine	Amine	87-52-5	0.167979	1.27546	/	-
BenzenAmine, 2,5-dimethyl-	Amine	95-78-3	0.337202	1.18248	/	-
N,N-Dimethyl-1,2,3-trithian-5-Amine	Amine	31895-21-3	0.0389347	0.94242	/	-
Lidocaine	Amine	137-58-6	0.0732559	0.493518	/	-
BenzphetAmine	Amine	156-08-1	0.0617988	0.472748	/	-
Benzene, 1-ethenyl-3,5-dimethyl-	Aromatics	5379-20-4	1.93277	1.77571	/	√
2,5-di-tert-Butyl-1,4-benzoquinone	Aromatics	2460-77-7	0.381093	1.35693	/	-
Formamide, N-phenyl-	Aromatics	103-70-8	0.213756	1.29143	/	-
Benzene, nitro-	Aromatics	98-95-3	0.00731618	1.01433	/	-
1-(3-Methylbutyl)-2,3,5,6-tetramethylbenzene	Aromatics	116761-73-0	0.0255064	0.837752	/	-
Benzene, 1,2,3-trimethyl-	Aromatics	526-73-8	0.0304162	0.707503	/	-
Benzene, 1,2-diethyl-3,4,5,6-tetramethyl-	Aromatics	33884-69-4	0.0006303	0.501568	/	-
Dehydromevalonic lactone	Aromatics	2381-87-5	0.000374487	0.257354	/	-
Naphthalene, 1,4-dimethyl-	Aromatics	571-58-4	0.0034848	0.0844057	moldy resinous	-
Phenol, 4-(2-propenyl)-	Aromatics	501-92-8	0.0168598	0.443788	phenolic medicinal herbal	-
Estragole	Aromatics	140-67-0	0.360071	1.02482	sweet anise spicy green herbal	-
Benzoic acid, 1-methylethyl ester	Aromatics	939-48-0	0.150484	1.22177	sweet fruity floral balsamic	-
Dibutyl phthalate	Ester	84-74-2	1.39108	1.38403	/	√
N-Benzyloxy-2-carbomethoxyaziridine	Ester	53084-33-6	0.39092	1.3813	/	-
3-Methylheptyl acetate	Ester	72218-58-7	0.435034	1.07441	/	-
Bicyclo[3.1.1]hept-2-en-6-ol, 2,7,7-trimethyl-, acetate, [1S-(1α,5α,6β)]-	Ester	50764-55-1	0.155783	0.990793	/	-
2-Ethylhexyl acrylate	Ester	103-11-7	0.559651	0.941874	/	-
Butanoic acid, 3-methyl-, 8-decene-4,6-diynyl ester, (Z)-	Ester	126693-81-0	0.310938	0.828085	/	-
2-methylprop-2-enoyl 2-methylprop-2-enoate	Ester	760-93-0	0.0886405	0.684411	/	-
(1R,5S,6R)-2,7,7-Trimethylbicyclo[3.1.1]hept-2-en-6-yl acetate	Ester	67999-48-8	0.0487101	0.383968	/	-
Felbamate	Ester	25451-15-4	0.0491297	0.32778	/	-
Citronellyl valerate	Ester	7540-53-6	0.447453	0.945486	herbal honey	-
Isobornyl formate	Ester	1200-67-5	0.565122	1.23794	camphoreous musty medicinal woody	-
Benzeneacetic acid, 4-(1,1-dimethylethyl)-, methyl ester	Ester	3549-23-3	0.14853	1.1899	dairy leafy green waxy	-
Propanoic acid, 2-methyl-, 2-phenylethyl ester	Ester	103-48-0	0.0700859	1.2569	floral fruity tea	-
2-Furancarboxylic acid, hexyl ester	Ester	39251-86-0	0.0180244	1.04646	floral waxy green sweet	-
1,3-Cyclohexadiene-1-carboxylic acid, 2,6,6-trimethyl-, ethyl ester	Ester	35044-59-8	0.00648598	1.0364	floral,fresh, herbal, woody	-
β-Phenylethyl butyrate	Ester	103-52-6	0.0498751	1.27523	floral,musty sweet	-
Benzoic acid, hexyl ester	Ester	6789-88-4	0.116758	0.527874	fresh clean woody	-
Phenol, 2-methoxy-4-(2-propenyl)-, acetate	Ester	93-28-7	0.0772613	0.868877	fresh sweet woody floral spicy	-
n-Valeric acid cis-3-hexenyl ester	Ester	35852-46-1	0.587816	1.17575	green fruity	√
Geranyl isovalerate	Ester	109-20-6	0.0208488	0.534791	green fruity	-
2-Cyclohexen-1-ol, 2-methyl-5-(1-methylethenyl)-, acetate	Ester	97-42-7	0.109233	1.18985	green minty herbal spicy	-
2-Phenoxyethyl isobutyrate	Ester	103-60-6	3.74719e-05	1.13542	green sweet fruity honey floral waxy	-
6-Nonen-1-ol, acetate, (Z)-	Ester	76238-22-7	0.0324337	1.12174	melon green tropical pear metallic	-
Benzoic acid, ethyl ester	Ester	93-89-0	0.270982	1.138	minty,fruity dry musty sweet	-
n-Capric acid isobutyl ester	Ester	30673-38-2	0.341319	1.37916	oily sweet brandy apricot	-
2-Propenoic acid, 3-phenyl-, methyl ester, (E)-	Ester	1754-62-7	0.0607139	1.05232	sweet balsamic strawberry cherry	-
Citronellyl butyrate	Ester	141-16-2	0.029346	1.21871	sweet fruity floral,green waxy	-
Hexanoic acid, pentyl ester	Ester	540-07-8	0.0236352	1.20691	sweet green fruity fatty	-
Phenylacetic acid propyl ester	Ester	4606-15-9	0.0114637	1.2549	sweet honey floral	-
2,3-Dimethylanisole	Ether	2944-49-2	0.000807001	0.336128	/	-
1H-Pyrrolo[2,3-b]pyridine, 2-(1-methylethyl)-	Heterocyclic compound	27257-18-7	0.0669957	1.28017	/	-
Sesquirosefuran	Heterocyclic compound	39007-93-7	0.235281	1.2184	/	-
Thieno[2,3-b]thiophene,2-methyl-	Heterocyclic compound	13393-75-4	0.231373	1.16911	/	-
2-Acetyl-3-methylbenzo[b]thiophene	Heterocyclic compound	18781-31-2	0.105898	1.13497	/	-
2,5-Dibutoxy-2,5-dihydrofuran	Heterocyclic compound	20295-23-2	0.0636204	1.09544	/	-
2,4-Quinolinediol	Heterocyclic compound	86-95-3	0.574014	1.02025	/	√
5H-5-Methyl-6,7-dihydrocyclopentapyrazine	Heterocyclic compound	23747-48-0	0.486456	0.934367	/	-
3-Acetyl-2,5-dimethylbenzo(b)thiophene	Heterocyclic compound	6179-04-0	0.410104	0.8804	/	-
Ficusin	Heterocyclic compound	66-97-7	0.284206	0.851582	/	-
2-Acetylpyrrolidine	Heterocyclic compound	60026-20-2	0.427804	0.829397	/	-
3-Pentyl-4,5,6,7-tetrahydro-1H-indazole	Heterocyclic compound	22122-91-4	0.2699	0.681414	/	-
trans-O-Dithiane-4,5-diol	Heterocyclic compound	14193-38-5	0.00138444	0.196108	/	-
Indole, 3-methyl-	Heterocyclic compound	83-34-1	0.145671	1.27329	animal fecal naphthyl civet	-
Pyrazine, 2-methoxy-3-(1-methylpropyl)-	Heterocyclic compound	24168-70-5	0.0260886	1.11289	green	-
2-Cyclohexen-1-one, 3-methyl-6-(1-methylethyl)-	Heterocyclic compound	89-81-6	0.328896	1.24893	herbal minty camphoreous medicinal	-
1-Pentanone, 1-(2-furanyl)-	Heterocyclic compound	3194-17-0	0.0235322	0.245768	sweet caramellic	-
Hydrocoumarin	Heterocyclic compound	119-84-6	0.0142571	1.24778	sweet tonka herbal	-
Coumarin	Heterocyclic compound	91-64-5	0.0499522	1.28007	tonka,sweet	-
1,3-Benzodioxole, 4,5-dimethoxy-6-(2-propenyl)-	Heterocyclic compound	484-31-1	0.28147	0.79851	woody spicy	-
Decane, 2,5,9-trimethyl-	Hydrocarbons	62108-22-9	0.037772	1.17149	/	-
1,7-Octadiene, 2,7-dimethyl-3,6-bis(methylene)-	Hydrocarbons	16714-60-6	0.00125912	1.03016	/	-
1,E-11,Z-13-Hexadecatriene	Hydrocarbons	80634-97-5	0.00634653	0.823114	/	-
(Z)-2,2-Dimethyl-3-(3-methylpenta-2,4-dien-1-yl)oxirane	Hydrocarbons	33281-83-3	0.26872	0.798083	/	-
Ethanone, 1-(1H-pyrazol-4-yl)-	Ketone	25016-16-4	0.88717	1.46239	/	√
1-Pentanone, 1-(p-anisyl)-3-methyl-	Ketone	66333-82-2	0.506711	1.42506	/	-
6-Methyl-6-(5-methylfuran-2-yl)heptan-2-one	Ketone	50464-95-4	0.446829	1.31136	/	-
1-Pentanone, 1-(4-methylphenyl)-	Ketone	1671-77-8	0.0544874	1.27698	/	-
1-Butanone, 2-hydroxy-1-phenyl-	Ketone	16183-46-3	0.0481632	1.25243	/	-
1H-Inden-1-one, 2,3-dihydro-	Ketone	83-33-0	0.0951531	1.12802	/	-
5-Hepten-2-one, 4,6-dimethyl-	Ketone	31162-48-8	0.0180978	1.05018	/	-
Ethanone, 1-(3-hydroxyphenyl)-	Ketone	121-71-1	0.00597984	1.03671	/	-
Ethanone, 1-(3-methylphenyl)-	Ketone	585-74-0	0.00108473	1.01544	/	-
3,5,9-Undecatrien-2-one, 6,10-dimethyl-, (E,Z)-	Ketone	13927-47-4	0.000919975	0.997256	/	-
4,6-Octadiyn-3-one, 2-methyl-	Ketone	29743-33-7	0.00365131	0.891494	/	-
1,3-Pentanedione, 4,4-dimethyl-1-phenyl-	Ketone	13988-67-5	0.0241622	0.835127	/	-
Bicyclo[3.1.1]heptan-3-one, 2-hydroxy-2,6,6-trimethyl-	Ketone	10136-65-9	0.0043857	0.78348	/	-
1-((1S,3aR,4S,7R,7aR)-3a,7a-Dimethyloctahydro-1H-4,7-methanoinden-1-yl)ethanone	Ketone	66748-84-3	0.0365316	0.699848	/	-
1-Pentanone, 1-phenyl-	Ketone	1009-14-9	0.123239	1.02426	balsamic valerian root	-
2-Cyclopenten-1-one, 2-hydroxy-3,4-dimethyl-	Ketone	21835-00-7	0.00798384	0.159033	caramellic	-
2-Butanone, 4-(2,6,6-trimethyl-1-cyclohexen-1-yl)-	Ketone	17283-81-7	0.0057611	1.03332	earthy woody orris dry	-
5,9-Undecadien-2-one, 6,10-dimethyl-, (Z)-	Ketone	3879-26-3	0.209397	1.0421	fatty metallic	-
2-Tridecanone	Ketone	593-08-8	0.00856544	1.13577	fatty waxy dairy milky coconut nutty herbal earthy	-
Ethanone, 1-(2,4-dimethylphenyl)-	Ketone	89-74-7	0.545813	1.11895	floral woody sweet minty	√
2-Nonanone, 3-(hydroxymethyl)-	Ketone	67801-33-6	0.0881701	0.761694	herbal fresh sweet green weedy earthy	-
2-Cyclohexen-1-one, 3-methyl-	Ketone	1193-18-6	0.0407293	0.445826	nutty caramellic phenolic cherry	-
Ethanone, 1-(2-methylphenyl)-	Ketone	577-16-2	0.00216756	0.21076	sweet hawthorn powdery anisic coumarinic phenolic burnt nutty honey	-
3,5,9-Undecatrien-2-one, 6,10-dimethyl-	Ketone	141-10-6	0.485858	1.06821	sweet waxy citrus floral balsamic dry powdery	√
Propanenitrile, 3-(butylphenylamino)-	Nitrogen compounds	61852-40-2	0.0167275	0.43304	/	-
1-iodo-Decane	Others	2050-77-3	0.06932	0.581656	/	-
Butanoic acid, anhydride	Others	106-31-0	0.0900409	1.22773	butter	-
Catechol	Phenol	120-80-9	0.338764	0.815854	/	-
cis-Chrysanthenol	Phenol	55722-60-6	0.273891	0.740446	/	-
Propofol	Phenol	2078-54-8	0.0139184	1.02351	phenolic	-
(1aR,1bS,2aS,5S,5aS,7aS)-2,2,5,7a-Tetramethyldecahydrocyclopenta[2',3']cyclobuta[1',2':3,4]benzo[1,2-b]oxirene	Terpenoids	104188-24-1	0.391416	1.37484	/	-
(1S,4R,7S,8R,11R,13R)-4,7,11-Trimethyl-5-oxatetracyclo[5.4.2.01,8.04,13]tridecane	Terpenoids	18319-31-8	0.371438	1.36164	/	-
2,6,9,11-Dodecatetraenal, 2,6,10-trimethyl-	Terpenoids	4955-32-2	0.334614	1.29906	/	-
10,10-Dimethyl-2,6-dimethylenebicyclo[7.2.0]undecane	Terpenoids	357414-37-0	0.0943429	1.28797	/	-
(-)-Aristolene	Terpenoids	6831-16-9	0.0572345	1.28199	/	-
(1R,3aS,8aS)-7-Isopropyl-1,4-dimethyl-1,2,3,3a,6,8a-hexahydroazulene	Terpenoids	36577-33-0	0.0565006	1.28137	/	-
(1S,4aR,7R)-1,4a-Dimethyl-7-(prop-1-en-2-yl)-1,2,3,4,4a,5,6,7-octahydronaphthalene	Terpenoids	52026-55-8	0.032447	1.2733	/	-
(3S,3aS,6R,8aS)-3,8,8-Trimethyl-7-methyleneoctahydro-1H-3a,6-methanoazulene	Terpenoids	31145-21-8	0.0492306	1.27139	/	-
1,1,7,7a-Tetramethyl-1a,2,6,7,7a,7b-hexahydro-1H-cyclopropa[a]naphthalene	Terpenoids	154098-14-3	0.0408271	1.25149	/	-
cis-Calamenene	Terpenoids	72937-55-4	0.0848515	1.24556	/	-
1H-3a,7-Methanoazulene, 2,3,4,7,8,8a-hexahydro-3,6,8,8-tetramethyl-, (3R,3aS,7S,8aR)-	Terpenoids	65354-33-8	0.0181446	1.24382	/	-
(1S,5S)-2-Methyl-5-((R)-6-methylhept-5-en-2-yl)bicyclo[3.1.0]hex-2-ene	Terpenoids	159407-35-9	0.0181263	1.24376	/	-
(1R,3aR,4aR,8aR)-1,4,4,6-Tetramethyl-1,2,3,3a,4,4a,7,8-octahydrocyclopenta[1,4]cyclobuta[1,2]benzene	Terpenoids	94482-89-0	0.00738746	1.2368	/	-
[4aS-(4aα,5α,8aβ)]- decahydro-1,1,4a-trimethyl-6-methylene-5-(3-methyl-2,4-pentadienyl)-Naphthalene	Terpenoids	5957-33-5	1.05048	1.22578	/	√
dl-Camphoroquinone	Terpenoids	10373-78-1	0.103658	1.17208	/	-
4a,8-Dimethyl-2-(prop-1-en-2-yl)-1,2,3,4,4a,5,6,7-octahydronaphthalene	Terpenoids	103827-22-1	0.484986	1.15315	/	-
trans-Calamenene	Terpenoids	73209-42-4	0.181093	1.11573	/	-
Di-epi-α-cedrene-(I)	Terpenoids	21996-77-0	0.29652	1.10272	/	-
(E)-1-Methyl-4-(6-methylhept-5-en-2-ylidene)cyclohex-1-ene	Terpenoids	53585-13-0	0.0205757	1.0821	/	-
Cyclohexanone, 5-methyl-2-(1-methylethenyl)-	Terpenoids	529-00-0	0.0353234	1.04975	/	-
Bicyclo[3.1.1]hept-2-ene, 2,6-dimethyl-6-(4-methyl-3-pentenyl)-	Terpenoids	17699-05-7	0.0148258	1.0382	/	-
Bicyclo[3.1.1]heptan-3-one, 2,6,6-trimethyl-, (1α,2β,5α)-	Terpenoids	15358-88-0	0.0519995	1.03631	/	-
7-Octylidenebicyclo[4.1.0]heptane	Terpenoids	82253-11-0	0.0378865	1.03624	/	-
cis-p-Mentha-2,8-dien-1-ol	Terpenoids	3886-78-0	0.625167	1.03188	/	√
Ylangene	Terpenoids	14912-44-8	0.268838	1.02817	/	-
3a,7-Methano-3aH-cyclopentacyclooctene, 1,4,5,6,7,8,9,9a-octahydro-1,1,7-trimethyl-, [3aR-(3aα,7α,9aβ)]-	Terpenoids	469-92-1	0.604322	1.02042	/	√
Dauca-4(11),8-diene	Terpenoids	395070-76-5	0.00398592	1.01681	/	-
Kessane	Terpenoids	3321-66-2	0.0434151	1.01224	/	-
1,2,4-Methenoazulene, decahydro-1,5,5,8a-tetramethyl-, [1S-(1α,2α,3aβ,4α,8aβ,9R*)]-	Terpenoids	1137-12-8	0.0107126	0.994483	/	-
Naphthalene, 1,2,4a,5,8,8a-hexahydro-4,7-dimethyl-1-(1-methylethyl)-, (1α,4aβ,8aα)-(.+/-.)-	Terpenoids	5951-61-1	0.494635	0.874076	/	-
trans-Rose oxide	Terpenoids	876-18-6	0.0271386	0.826243	/	-
Ethanone, 1-(1,3-dimethyl-3-cyclohexen-1-yl)-	Terpenoids	51733-68-7	0.243524	0.738626	/	-
[3R-(3α,4aβ,6aα,10aβ,10bα)]- 3-ethenyldodecahydro-3,4a,7,7,10a-pentamethyl-1H-Naphtho[2,1-b]pyran	Terpenoids	596-84-9	0.148606	0.502164	/	-
4-Isopropyl-6-methyl-1-methylene-1,2,3,4-tetrahydronaphthalene	Terpenoids	50277-34-4	0.172284	0.486397	/	-
7-Oxabicyclo[4.1.0]heptane, 1-methyl-4-(1-methylethenyl)-	Terpenoids	1195-92-2	0.390629	1.02412	citrus fresh clean minty spearmint herbal	-
1H-Cyclopenta[1,3]cyclopropa[1,2]benzene, octahydro-7-methyl-3-methylene-4-(1-methylethyl)-, [3aS-(3aα,3bβ,4β,7α,7aS*)]-	Terpenoids	13744-15-5	0.0223197	1.22037	citrus fruity radish	-
cis-β-Farnesene	Terpenoids	28973-97-9	0.105618	1.29608	citrus green	-
d-Nerolidol	Terpenoids	142-50-7	0.23414	1.32526	floral	-
4-Hexen-1-ol, 5-methyl-2-(1-methylethenyl)-, (R)-	Terpenoids	498-16-8	0.0113588	0.444143	herbal	-
3-Cyclohexene-1-methanol, α,α,4-trimethyl-, propanoate	Terpenoids	80-27-3	0.00613072	1.03686	herbal green woody	-
Naphthalene, 1,2,3,4-tetrahydro-1,6-dimethyl-4-(1-methylethyl)-, (1S-cis)-	Terpenoids	483-77-2	0.0938439	1.02923	herbal spice	-
Bicyclo[3.1.1]hept-2-ene-2-methanol, 6,6-dimethyl-	Terpenoids	515-00-4	1.02409	1.37887	herbal,woody,balsamic sweet	√
Pinocarvone	Terpenoids	30460-92-5	0.232786	0.696482	minty	-
Carveol	Terpenoids	99-48-9	0.352326	1.31121	minty green herbal spicy	-
β-Phellandrene	Terpenoids	555-10-2	0.780047	1.32046	minty terpenic	√
Levomenthol	Terpenoids	2216-51-5	0.0611963	1.12836	peppermint cooling mentholic minty	-
endo-Borneol	Terpenoids	507-70-0	0.294129	0.755642	pine woody camphoreous balsamic	-
Benzofuran, 4,5,6,7-tetrahydro-3,6-dimethyl-	Terpenoids	494-90-6	0.270879	0.728718	pungent musty nutty earthy	-
Caryophyllene oxide	Terpenoids	1139-30-6	0.541063	1.02494	sweet fresh dry woody	√
(-)-Bornyl acetate	Terpenoids	5655-61-8	0.159197	1.16216	sweet,woody,fresh ,herbal	-
Aromandendrene	Terpenoids	489-39-4	0.106051	1.29624	woody	-
(-)-Myrtenol	Terpenoids	19894-97-4	0.182868	1.27306	woody medicinal	-
Naphthalene, 1,2,4a,5,6,8a-hexahydro-4,7-dimethyl-1-(1-methylethyl)-, [1S-(1α,4aβ,8aα)]-	Terpenoids	24406-05-1	0.0623512	0.717006	woody dry	-
γ-Terpinene	Terpenoids	99-85-4	0.529551	1.01067	woody terpenic lemon,herbal	√
trans-α-Bergamotene	Terpenoids	13474-59-4	0.473752	0.918501	woody warm tea	-
The odor quality of compounds were taken from http://www.thegoodscentscompany.com/
“/”Indicates that no aroma related information is found
“-” indicates that the substance is not a characteristic aroma component
